# Supplementary material for: Pathologic polyglutamine aggregation begins with a self-poisoning polymer crystal
Source: eLife. 2023 Nov 3;12:RP86939. doi: 10.7554/eLife.86939 (PMC10624427; doi:10.7554/eLife.86939)
Supplement: Supplementary file 1. [file elife-86939-supp1.xlsx]

## Sheet: Sheet1
Figure panel	plasmid name	Annotated Sequence	Inserted Peptide Sequence	fullORFDNA_sequence	fullORFAA_sequence
3 C; 3 Supplement 1 B	rhx0935	mEos3.1		ATGGACCCAGCTTTCTTGTACAAAGTGGTGATGGGCTGCAGGAATTCGATATCAAGCTCACCTGAAGCTGCGGCAAGAGAAGCGGCTGCACGTGAGGCCGCAGCAAGAGAGGCTGCTGCCAGAGGTGGTGGAAGAATTAATGGAGGAGGGGGTGGCGCTATGTCTGCCATTAAACCTGACATGAAAATCAAACTGAGAATGGAAGGAAACGTCAATGGCCATCACTTTGTAATCGACGGTGATGGTACAGGAAAACCATTCGAAGGTAAGCAAAGCATGGATCTGGAGGTAAAAGAGGGTGGCCCACTCCCATTTGCATTCGATATCTTAACCACCGCCTTTCATTACGGTAACAGAGTTTTTGCAAAGTATCCTGATAACATTCAAGATTATTTCAAA…	MDPAFLYKVVMGCRNSISSSPEAAAREAAAREAAAREAAARGGGRINGGGGGAMSAIKPDMKIKLRMEGNVNGHHFVIDGDGTGKPFEGKQSMDLEVKEGGPLPFAFDILTTAFHYGNRVFAKYPDNIQDYFKQSFPKGYSWERSLTFEDGGICNARNDITMEGDTFYNKVRFYGTNFPANGPVMQKKTLKWEPSTEKMYVRDGVLTGDVEMALLLEGNAHYRCDFRTTYKAKEKGVKLPGAHFVDHCIEILSHDKDYNKVKLYEHAVAHSGLPDNARR
3 C; 3 Supplement 1 B	rhx0974	Sup35 PrD	MSDSNQGNNQ QNYQQYSQNG NQQQGNNRYQ GYQAYNAQAQ PAGGYYQNYQ GYSGYQQGGY QQYNPDAGYQ QQYNPQGGYQ QYNPQGGYQQ QFNPQGGRGN YKNFNYNNNL QGYQAGFQPQ SQGMSLNDFQ KQQKQ	ATGTCGGATTCAAACCAAGGCAACAATCAGCAAAACTACCAGCAATACAGCCAGAACGGTAACCAACAACAAGGTAACAACAGATACCAAGGTTATCAAGCTTACAATGCTCAAGCCCAACCTGCAGGTGGGTACTACCAAAATTACCAAGGTTATTCTGGGTACCAACAAGGTGGCTATCAACAGTACAATCCCGACGCCGGTTACCAGCAACAGTATAATCCTCAAGGAGGCTATCAACAGTACAATCCTCAAGGCGGTTATCAGCAGCAATTCAATCCACAAGGTGGCCGTGGAAATTACAAAAACTTCAACTACAATAACAATTTGCAAGGATATCAAGCTGGTTTCCAACCACAGTCTCAAGGTATGTCTTTGAACGACTTTCAAAAGCAACAA…	MSDSNQGNNQQNYQQYSQNGNQQQGNNRYQGYQAYNAQAQPAGGYYQNYQGYSGYQQGGYQQYNPDAGYQQQYNPQGGYQQYNPQGGYQQQFNPQGGRGNYKNFNYNNNLQGYQAGFQPQSQGMSLNDFQKQQKQCDPAFLYKVVMGCRNSISSSPEAAAREAAAREAAAREAAARGGGRINGGGGGAMSAIKPDMKIKLRMEGNVNGHHFVIDGDGTGKPFEGKQSMDLEVKEGGPLPFAFDILTTAFHYGNRVFAKYPDNIQDYFKQSFPKGYSWERSLTFEDGGICNARNDITMEGDTFYNKVRFYGTNFPANGPVMQKKTLKWEPSTEKMYVRDGVLTGDVEMALLLEGNAHYRCDFRTTYKAKEKGVKLPGAHFVDHCIEILSHDKDYNKVKLY…
1 D	rhx1177a	Q85	QQQQQQQQQQ QQQQQQQQQQ QQQQQQQQQQ QQQQQQQQQQ QQQQQQQQQQ QQQQQQQQQQ QQQQQQQQQQ QQQQQQQQQQ QQQQQ	ATGTCTGGCCAGCAACAACAGCAACAGCAACAACAGCAACAGCAACAACAGCAACAGCAACAACAGCAACAGCAACAACAGCAACAGCAACAACAGCAACAGCAACAACAGCAACAGCAACAACAGCAACAGCAACAACAGCAACAGCAACAACAGCAACAGCAACAACAGCAACAGCAACAACAGCAACAGCAACAACAGCAACAGCAACAACAGCAACAGCAACAACAGCAACAGCAACAACAGCAACAGCAACAACAGCAACCTCAAGGCGCCGAAGCTGCGGCAAGAGAAGCGGCTGCACGTGAGGCCGCAGCAAGAGAGGCTGCTGCCAGAATTAATATGTCTGCCATTAAACCTGACATGAAAATCAAACTGAGAATGGAAGGAAACGTCAAT…	MSGQQQQQQQQQQQQQQQQQQQQQQQQQQQQQQQQQQQQQQQQQQQQQQQQQQQQQQQQQQQQQQQQQQQQQQQQQQQQQQQQQQQQQPQGAEAAAREAAAREAAAREAAARINMSAIKPDMKIKLRMEGNVNGHHFVIDGDGTGKPFEGKQSMDLEVKEGGPLPFAFDILTTAFHYGNRVFAKYPDNIQDYFKQSFPKGYSWERSLTFEDGGICNARNDITMEGDTFYNKVRFYGTNFPANGPVMQKKTLKWEPSTEKMYVRDGVLTGDVEMALLLEGNAHYRCDFRTTYKAKEKGVKLPGAHFVDHCIEILSHDKDYNKVKLYEHAVAHSGLPDNARR
1 D	rhx1177d	Q20	QQQQQQQQQQ QQQQQQQQQQ	ATGGGGATCAGCATGTCTGGCCAGCAACAACAGCAACAGCAACAACAGCAACCTCAAGGCGCCGAAGCTGCGGCAAGAGAAGCGGCTGCACGTGAGGCCGCAGCAAGAGAGGCTGCTGCCAGAATTAATATGTCTGCCATTAAACCTGACATGAAAATCAAACTGAGAATGGAAGGAAACGTCAATGGCCATCACTTTGTAATCGACGGTGATGGTACAGGAAAACCATTCGAAGGTAAGCAAAGCATGGATCTGGAGGTAAAAGAGGGTGGCCCACTCCCATTTGCATTCGATATCTTAACCACCGCCTTTCATTACGGTAACAGAGTTTTTGCAAAGTATCCTGATAACATTCAAGATTATTTCAAACAGTCATTTCCAAAGGGTTACAGTTGGGAA…	MSGQQQQQQQQQQPQGAEAAAREAAAREAAAREAAARINMSAIKPDMKIKLRMEGNVNGHHFVIDGDGTGKPFEGKQSMDLEVKEGGPLPFAFDILTTAFHYGNRVFAKYPDNIQDYFKQSFPKGYSWERSLTFEDGGICNARNDITMEGDTFYNKVRFYGTNFPANGPVMQKKTLKWEPSTEKMYVRDGVLTGDVEMALLLEGNAHYRCDFRTTYKAKEKGVKLPGAHFVDHCIEILSHDKDYNKVKLYEHAVAHSGLPDNARR
1 D	rhx1177e	Q30	QQQQQQQQQQ QQQQQQQQQQ QQQQQQQQQQ	ATGTCTGGCCAGCAACAACAGCAACAGCAACAACAGCAACAGCAACAACAGCAACAGCAACAACAGCAACAGCAACAACAGCAACAGCAACAACAGCAACAGCAACAACAGCAACAGCAACAACAGCAACAGCAACAACAGCAACAGCAACAACAGCAACAGCAACAACAGCAACCTCAAGGCGCCGAAGCTGCGGCAAGAGAAGCGGCTGCACGTGAGGCCGCAGCAAGAGAGGCTGCTGCCAGAATTAATATGTCTGCCATTAAACCTGACATGAAAATCAAACTGAGAATGGAAGGAAACGTCAATGGCCATCACTTTGTAATCGACGGTGATGGTACAGGAAAACCATTCGAAGGTAAGCAAAGCATGGATCTGGAGGTAAAAGAGGGTGGCCCA…	MSGQQQQQQQQQQQQQQQQQQQQQQQQQQQQQQQQQQQQQQQQQQQQQQQQQQQQQQQPQGAEAAAREAAAREAAAREAAARINMSAIKPDMKIKLRMEGNVNGHHFVIDGDGTGKPFEGKQSMDLEVKEGGPLPFAFDILTTAFHYGNRVFAKYPDNIQDYFKQSFPKGYSWERSLTFEDGGICNARNDITMEGDTFYNKVRFYGTNFPANGPVMQKKTLKWEPSTEKMYVRDGVLTGDVEMALLLEGNAHYRCDFRTTYKAKEKGVKLPGAHFVDHCIEILSHDKDYNKVKLYEHAVAHSGLPDNARR
1 D	rhx1177f	Q70	QQQQQQQQQQ QQQQQQQQQQ QQQQQQQQQQ QQQQQQQQQQ QQQQQQQQQQ QQQQQQQQQQ QQQQQQQQQQ	ATGTCTGGCCAGCAACAACAGCAACAGCAACAACAGCAACAGCAACAACAGCAACAGCAACAACAGCAACAGCAACAACAGCAACAGCAACAACAGCAACAGCAACAACAGCAACAGCAACAACAGCAACAGCAACAACAGCAACAGCAACAACAGCAACAGCAACAACAGCAACAGCAACAACAGCAACAGCAACAACAGCAACAGCAACAACAGCAACAGCAACAACAGCAACAGCAACAACAGCAACAGCAACAACAGCAACAGCAACAACAGCAACAGCAACAACAGCAACAGCAACAACAGCAACAGCAACAACAGCAACAGCAACAACAGCAACAGCAACAACAGCAACAGCAACAACAGCAACAGCAACAACAGCAACAGCAACAACAGCAA…	MSGQQQQQQQQQQQQQQQQQQQQQQQQQQQQQQQQQQQQQQQQQQQQQQQQQQQQQQQQQQQQQQQQQQQQQQQQQQQQQQQQQQQQQQQQQQQQQQQQQQQQQQQQQQQQQQQQQQQQQQQQQQQQQQQQQQQQQQQQQQQQPQGAEAAAREAAAREAAAREAAARINMSAIKPDMKIKLRMEGNVNGHHFVIDGDGTGKPFEGKQSMDLEVKEGGPLPFAFDILTTAFHYGNRVFAKYPDNIQDYFKQSFPKGYSWERSLTFEDGGICNARNDITMEGDTFYNKVRFYGTNFPANGPVMQKKTLKWEPSTEKMYVRDGVLTGDVEMALLLEGNAHYRCDFRTTYKAKEKGVKLPGAHFVDHCIEILSHDKDYNKVKLYEHAVAHSGLPDNARR
1 D	rhx1177g	Q10	QQQQQQQQQQ	ATGGGGATCAGCATGTCTGGCCAGCAACAACAGCAACAGCAACAACAGCAACAGCAACAACAGCAACAGCAACAACAGCAACCTCAAGGCGCCGAAGCTGCGGCAAGAGAAGCGGCTGCACGTGAGGCCGCAGCAAGAGAGGCTGCTGCCAGAATTAATATGTCTGCCATTAAACCTGACATGAAAATCAAACTGAGAATGGAAGGAAACGTCAATGGCCATCACTTTGTAATCGACGGTGATGGTACAGGAAAACCATTCGAAGGTAAGCAAAGCATGGATCTGGAGGTAAAAGAGGGTGGCCCACTCCCATTTGCATTCGATATCTTAACCACCGCCTTTCATTACGGTAACAGAGTTTTTGCAAAGTATCCTGATAACATTCAAGATTATTTCAAA…	MSGQQQQQQQQQQQQQQQQQQQQPQGAEAAAREAAAREAAAREAAARINMSAIKPDMKIKLRMEGNVNGHHFVIDGDGTGKPFEGKQSMDLEVKEGGPLPFAFDILTTAFHYGNRVFAKYPDNIQDYFKQSFPKGYSWERSLTFEDGGICNARNDITMEGDTFYNKVRFYGTNFPANGPVMQKKTLKWEPSTEKMYVRDGVLTGDVEMALLLEGNAHYRCDFRTTYKAKEKGVKLPGAHFVDHCIEILSHDKDYNKVKLYEHAVAHSGLPDNARR
1 D	rhx1177h	Q55	QQQQQQQQQQ QQQQQQQQQQ QQQQQQQQQQ QQQQQQQQQQ QQQQQQQQQQ QQQQQ	ATGGGGATCAGCATGTCTGGCCAGCAACAACAGCAACAGCAACAACAGCAACAGCAACAACAGCAACAGCAACAACAGCAACAGCAACAACAGCAACAGCAACAACAGCAACCTCAAGGCGCCGAAGCTGCGGCAAGAGAAGCGGCTGCACGTGAGGCCGCAGCAAGAGAGGCTGCTGCCAGAATTAATATGTCTGCCATTAAACCTGACATGAAAATCAAACTGAGAATGGAAGGAAACGTCAATGGCCATCACTTTGTAATCGACGGTGATGGTACAGGAAAACCATTCGAAGGTAAGCAAAGCATGGATCTGGAGGTAAAAGAGGGTGGCCCACTCCCATTTGCATTCGATATCTTAACCACCGCCTTTCATTACGGTAACAGAGTTTTTGCAAAG…	MSGQQQQQQQQQQQQQQQQQQQQQQQQQQQQQQPQGAEAAAREAAAREAAAREAAARINMSAIKPDMKIKLRMEGNVNGHHFVIDGDGTGKPFEGKQSMDLEVKEGGPLPFAFDILTTAFHYGNRVFAKYPDNIQDYFKQSFPKGYSWERSLTFEDGGICNARNDITMEGDTFYNKVRFYGTNFPANGPVMQKKTLKWEPSTEKMYVRDGVLTGDVEMALLLEGNAHYRCDFRTTYKAKEKGVKLPGAHFVDHCIEILSHDKDYNKVKLYEHAVAHSGLPDNARR
1 D	rhx1177j	Q140	QQQQQQQQQQ QQQQQQQQQQ QQQQQQQQQQ QQQQQQQQQQ QQQQQQQQQQ QQQQQQQQQQ QQQQQQQQQQ QQQQQQQQQQ QQQQQQQQQQ QQQQQQQQQQ QQQQQQQQQQ QQQQQQQQQQ QQQQQQQQQQ QQQQQQQQQQ	ATGGGGATCAGCATGTCTGGCCAGCAACAACAGCAACAGCAACAACAGCAACAGCAACAACAGCAACAGCAACAACAGCAACAGCAACAACAGCAACAGCAACAACAGCAACAGCAACAACAGCAACAGCAACAACAGCAACAGCAACAACAGCAACAGCAACAACAGCAACAGCAACAACAGCAACAGCAACAACAGCAACAGCAACAACAGCAACAGCAACAACAGCAACCTCAAGGCGCCGAAGCTGCGGCAAGAGAAGCGGCTGCACGTGAGGCCGCAGCAAGAGAGGCTGCTGCCAGAATTAATATGTCTGCCATTAAACCTGACATGAAAATCAAACTGAGAATGGAAGGAAACGTCAATGGCCATCACTTTGTAATCGACGGTGATGGTACA…	MSGQQQQQQQQQQQQQQQQQQQQQQQQQQQQQQQQQQQQQQQQQQQQQQQQQQQQQQQQQQQQQQQQQQQQQQPQGAEAAAREAAAREAAAREAAARINMSAIKPDMKIKLRMEGNVNGHHFVIDGDGTGKPFEGKQSMDLEVKEGGPLPFAFDILTTAFHYGNRVFAKYPDNIQDYFKQSFPKGYSWERSLTFEDGGICNARNDITMEGDTFYNKVRFYGTNFPANGPVMQKKTLKWEPSTEKMYVRDGVLTGDVEMALLLEGNAHYRCDFRTTYKAKEKGVKLPGAHFVDHCIEILSHDKDYNKVKLYEHAVAHSGLPDNARR
1 D	rhx1177l	Q35	QQQQQQQQQQ QQQQQQQQQQ QQQQQQQQQQ QQQQQ	ATGGGGATCAGCATGTCTGGCCAGCAACAACAGCAACAGCAACAACAGCAACAGCAACAACAGCAACAGCAACAACAGCAACAGCAACAACAGCAACAGCAACAACAGCAACAGCAACAACAGCAACCTCAAGGCGCCGAAGCTGCGGCAAGAGAAGCGGCTGCACGTGAGGCCGCAGCAAGAGAGGCTGCTGCCAGAATTAATATGTCTGCCATTAAACCTGACATGAAAATCAAACTGAGAATGGAAGGAAACGTCAATGGCCATCACTTTGTAATCGACGGTGATGGTACAGGAAAACCATTCGAAGGTAAGCAAAGCATGGATCTGGAGGTAAAAGAGGGTGGCCCACTCCCATTTGCATTCGATATCTTAACCACCGCCTTTCATTACGGTAAC…	MSGQQQQQQQQQQQQQQQQQQQQQQQQQQQQQQQQQQQPQGAEAAAREAAAREAAAREAAARINMSAIKPDMKIKLRMEGNVNGHHFVIDGDGTGKPFEGKQSMDLEVKEGGPLPFAFDILTTAFHYGNRVFAKYPDNIQDYFKQSFPKGYSWERSLTFEDGGICNARNDITMEGDTFYNKVRFYGTNFPANGPVMQKKTLKWEPSTEKMYVRDGVLTGDVEMALLLEGNAHYRCDFRTTYKAKEKGVKLPGAHFVDHCIEILSHDKDYNKVKLYEHAVAHSGLPDNARR
1 D	rhx1177m	Q40	QQQQQQQQQQ QQQQQQQQQQ QQQQQQQQQQ QQQQQQQQQQ	ATGGGGATCAGCATGTCTGGCCAGCAACAACAGCAACAGCAACAACAGCAACAGCAACAACAGCAACAGCAACAACAGCAACAGCAACAACAGCAACAGCAACAACAGCAACAGCAACAACAGCAACAGCAACAACAGCAACCTCAAGGCGCCGAAGCTGCGGCAAGAGAAGCGGCTGCACGTGAGGCCGCAGCAAGAGAGGCTGCTGCCAGAATTAATATGTCTGCCATTAAACCTGACATGAAAATCAAACTGAGAATGGAAGGAAACGTCAATGGCCATCACTTTGTAATCGACGGTGATGGTACAGGAAAACCATTCGAAGGTAAGCAAAGCATGGATCTGGAGGTAAAAGAGGGTGGCCCACTCCCATTTGCATTCGATATCTTAACCACCGCC…	MSGQQQQQQQQQQQQQQQQQQQQQQQQQQQQQQQQQQQQQQQQPQGAEAAAREAAAREAAAREAAARINMSAIKPDMKIKLRMEGNVNGHHFVIDGDGTGKPFEGKQSMDLEVKEGGPLPFAFDILTTAFHYGNRVFAKYPDNIQDYFKQSFPKGYSWERSLTFEDGGICNARNDITMEGDTFYNKVRFYGTNFPANGPVMQKKTLKWEPSTEKMYVRDGVLTGDVEMALLLEGNAHYRCDFRTTYKAKEKGVKLPGAHFVDHCIEILSHDKDYNKVKLYEHAVAHSGLPDNARR
1 D	rhx1177n	Q45	QQQQQQQQQQ QQQQQQQQQQ QQQQQQQQQQ QQQQQQQQQQ QQQQQ	ATGGGGATCAGCATGTCTGGCCAGCAACAACAGCAACAGCAACAACAGCAACAGCAACAACAGCAACAGCAACAACAGCAACAGCAACAACAGCAACAGCAACAACAGCAACAGCAACAACAGCAACAGCAACAACAGCAACAGCAACAACAGCAACCTCAAGGCGCCGAAGCTGCGGCAAGAGAAGCGGCTGCACGTGAGGCCGCAGCAAGAGAGGCTGCTGCCAGAATTAATATGTCTGCCATTAAACCTGACATGAAAATCAAACTGAGAATGGAAGGAAACGTCAATGGCCATCACTTTGTAATCGACGGTGATGGTACAGGAAAACCATTCGAAGGTAAGCAAAGCATGGATCTGGAGGTAAAAGAGGGTGGCCCACTCCCATTTGCATTCGAT…	MSGQQQQQQQQQQQQQQQQQQQQQQQQQQQQQQQQQQQQQQQQQQQQQPQGAEAAAREAAAREAAAREAAARINMSAIKPDMKIKLRMEGNVNGHHFVIDGDGTGKPFEGKQSMDLEVKEGGPLPFAFDILTTAFHYGNRVFAKYPDNIQDYFKQSFPKGYSWERSLTFEDGGICNARNDITMEGDTFYNKVRFYGTNFPANGPVMQKKTLKWEPSTEKMYVRDGVLTGDVEMALLLEGNAHYRCDFRTTYKAKEKGVKLPGAHFVDHCIEILSHDKDYNKVKLYEHAVAHSGLPDNARR
1 D	rhx1177o	Q50	QQQQQQQQQQ QQQQQQQQQQ QQQQQQQQQQ QQQQQQQQQQ QQQQQQQQQQ	ATGGGGATCAGCATGTCTGGCCAGCAACAACAGCAACAGCAACAACAGCAACAGCAACAACAGCAACAGCAACAACAGCAACAGCAACAACAGCAACAGCAACAACAGCAACAGCAACAACAGCAACAGCAACAACAGCAACAGCAACAACAGCAACAGCAACAACAGCAACCTCAAGGCGCCGAAGCTGCGGCAAGAGAAGCGGCTGCACGTGAGGCCGCAGCAAGAGAGGCTGCTGCCAGAATTAATATGTCTGCCATTAAACCTGACATGAAAATCAAACTGAGAATGGAAGGAAACGTCAATGGCCATCACTTTGTAATCGACGGTGATGGTACAGGAAAACCATTCGAAGGTAAGCAAAGCATGGATCTGGAGGTAAAAGAGGGTGGCCCACTC…	MSGQQQQQQQQQQQQQQQQQQQQQQQQQQQQQQQQQQQQQQQQQQQQQQQQQQPQGAEAAAREAAAREAAAREAAARINMSAIKPDMKIKLRMEGNVNGHHFVIDGDGTGKPFEGKQSMDLEVKEGGPLPFAFDILTTAFHYGNRVFAKYPDNIQDYFKQSFPKGYSWERSLTFEDGGICNARNDITMEGDTFYNKVRFYGTNFPANGPVMQKKTLKWEPSTEKMYVRDGVLTGDVEMALLLEGNAHYRCDFRTTYKAKEKGVKLPGAHFVDHCIEILSHDKDYNKVKLYEHAVAHSGLPDNARR
1 E; 3 B,D; 4 A,D	rhx2602	Q3N	QQQNQQQNQQ QNQQQNQQQN QQQNQQQNQQ QNQQQNQQQN QQQNQQQNQQ QNQQQNQQQN	ATGTCTGGTCAACAACAAAACCAACAACAAAATCAGCAGCAAAATCAACAACAGAACCAACAACAAAATCAACAGCAGAATCAACAACAAAATCAGCAACAGAATCAGCAGCAAAACCAGCAGCAAAACCAGCAACAGAACCAGCAACAAAATCAACAGCAAAACCAGCAACAAAACCAGCAACAAAATCCACAAGGCGCCGAAGCTGCGGCAAGAGAAGCGGCTGCACGTGAGGCCGCAGCAAGAGAGGCTGCTGCCAGAATTAATATGTCTGCCATTAAACCTGACATGAAAATCAAACTGAGAATGGAAGGAAACGTCAATGGCCATCACTTTGTAATCGACGGTGATGGTACAGGAAAACCATTCGAAGGTAAGCAAAGCATGGATCTGGAGGTA…	MSGQQQNQQQNQQQNQQQNQQQNQQQNQQQNQQQNQQQNQQQNQQQNQQQNQQQNQQQNQQQNPQGAEAAAREAAAREAAAREAAARINMSAIKPDMKIKLRMEGNVNGHHFVIDGDGTGKPFEGKQSMDLEVKEGGPLPFAFDILTTAFHYGNRVFAKYPDNIQDYFKQSFPKGYSWERSLTFEDGGICNARNDITMEGDTFYNKVRFYGTNFPANGPVMQKKTLKWEPSTEKMYVRDGVLTGDVEMALLLEGNAHYRCDFRTTYKAKEKGVKLPGAHFVDHCIEILSHDKDYNKVKLYEHAVAHSGLPDNARR
1 E	rhx2603	Q4N	QQQQNQQQQN QQQQNQQQQN QQQQNQQQQN QQQQNQQQQN QQQQNQQQQN QQQQNQQQQN	ATGTCTGGTCAACAACAACAAAACCAACAACAACAAAATCAGCAGCAACAAAATCAACAACAGCAGAATCAACAACAACAAAATCAACAGCAGCAAAATCAGCAACAGCAAAATCAGCAACAACAGAACCAGCAGCAGCAGAACCAGCAACAACAAAATCAGCAACAACAAAACCAGCAGCAGCAAAATCCTCAAGGCGCCGAAGCTGCGGCAAGAGAAGCGGCTGCACGTGAGGCCGCAGCAAGAGAGGCTGCTGCCAGAATTAATATGTCTGCCATTAAACCTGACATGAAAATCAAACTGAGAATGGAAGGAAACGTCAATGGCCATCACTTTGTAATCGACGGTGATGGTACAGGAAAACCATTCGAAGGTAAGCAAAGCATGGATCTGGAGGTA…	MSGQQQQNQQQQNQQQQNQQQQNQQQQNQQQQNQQQQNQQQQNQQQQNQQQQNQQQQNQQQQNPQGAEAAAREAAAREAAAREAAARINMSAIKPDMKIKLRMEGNVNGHHFVIDGDGTGKPFEGKQSMDLEVKEGGPLPFAFDILTTAFHYGNRVFAKYPDNIQDYFKQSFPKGYSWERSLTFEDGGICNARNDITMEGDTFYNKVRFYGTNFPANGPVMQKKTLKWEPSTEKMYVRDGVLTGDVEMALLLEGNAHYRCDFRTTYKAKEKGVKLPGAHFVDHCIEILSHDKDYNKVKLYEHAVAHSGLPDNARR
1 E; 3 B,D; 4 Supplement 1 A	rhx2604	Q5N	QQQQQNQQQQ QNQQQQQNQQ QQQNQQQQQN QQQQQNQQQQ QNQQQQQNQQ QQQNQQQQQN	ATGTCTGGTCAACAACAACAACAAAACCAACAACAACAACAAAATCAGCAGCAACAACAAAATCAGCAACAGCAACAAAATCAGCAACAACAGCAAAATCAGCAACAACAACAGAATCAGCAACAACAACAAAACCAGCAACAACAACAAAATCAACAGCAGCAACAAAATCAACAGCAACAGCAAAACCCACAAGGCGCCGAAGCTGCGGCAAGAGAAGCGGCTGCACGTGAGGCCGCAGCAAGAGAGGCTGCTGCCAGAATTAATATGTCTGCCATTAAACCTGACATGAAAATCAAACTGAGAATGGAAGGAAACGTCAATGGCCATCACTTTGTAATCGACGGTGATGGTACAGGAAAACCATTCGAAGGTAAGCAAAGCATGGATCTGGAGGTA…	MSGQQQQQNQQQQQNQQQQQNQQQQQNQQQQQNQQQQQNQQQQQNQQQQQNQQQQQNQQQQQNPQGAEAAAREAAAREAAAREAAARINMSAIKPDMKIKLRMEGNVNGHHFVIDGDGTGKPFEGKQSMDLEVKEGGPLPFAFDILTTAFHYGNRVFAKYPDNIQDYFKQSFPKGYSWERSLTFEDGGICNARNDITMEGDTFYNKVRFYGTNFPANGPVMQKKTLKWEPSTEKMYVRDGVLTGDVEMALLLEGNAHYRCDFRTTYKAKEKGVKLPGAHFVDHCIEILSHDKDYNKVKLYEHAVAHSGLPDNARR
3 B,D; 4 A,D,E	rhx2605	Q7N	QQQQQQQNQQ QQQQQNQQQQ QQQNQQQQQQ QNQQQQQQQN QQQQQQQNQQ QQQQQNQQQQ	ATGTCTGGTCAACAGCAGCAACAACAACAAAACCAACAGCAACAGCAACAACAAAACCAACAACAGCAGCAGCAACAAAACCAACAACAACAGCAGCAACAAAATCAACAGCAACAACAGCAACAAAATCAACAACAGCAACAGCAGCAAAACCAACAGCAACAACAACAGCAAAATCAGCAACAACAACCTCAAGGCGCCGAAGCTGCGGCAAGAGAAGCGGCTGCACGTGAGGCCGCAGCAAGAGAGGCTGCTGCCAGAATTAATATGTCTGCCATTAAACCTGACATGAAAATCAAACTGAGAATGGAAGGAAACGTCAATGGCCATCACTTTGTAATCGACGGTGATGGTACAGGAAAACCATTCGAAGGTAAGCAAAGCATGGATCTGGAGGTA…	MSGQQQQQQQNQQQQQQQNQQQQQQQNQQQQQQQNQQQQQQQNQQQQQQQNQQQQQQQNQQQQPQGAEAAAREAAAREAAAREAAARINMSAIKPDMKIKLRMEGNVNGHHFVIDGDGTGKPFEGKQSMDLEVKEGGPLPFAFDILTTAFHYGNRVFAKYPDNIQDYFKQSFPKGYSWERSLTFEDGGICNARNDITMEGDTFYNKVRFYGTNFPANGPVMQKKTLKWEPSTEKMYVRDGVLTGDVEMALLLEGNAHYRCDFRTTYKAKEKGVKLPGAHFVDHCIEILSHDKDYNKVKLYEHAVAHSGLPDNARR
4 A,D	rhx2606	Q9N	QQQQQQQQQN QQQQQQQQQN QQQQQQQQQN QQQQQQQQQN QQQQQQQQQN QQQQQQQQQN	ATGTCTGGTCAACAGCAGCAACAACAACAACAACAAAATCAGCAGCAGCAGCAGCAGCAACAACAAAATCAGCAACAGCAGCAGCAGCAACAGCAAAATCAGCAGCAGCAACAACAGCAACAACAAAATCAACAGCAACAGCAACAGCAACAACAGAATCAGCAACAACAGCAGCAGCAGCAGCAGAATCCACAAGGCGCCGAAGCTGCGGCAAGAGAAGCGGCTGCACGTGAGGCCGCAGCAAGAGAGGCTGCTGCCAGAATTAATATGTCTGCCATTAAACCTGACATGAAAATCAAACTGAGAATGGAAGGAAACGTCAATGGCCATCACTTTGTAATCGACGGTGATGGTACAGGAAAACCATTCGAAGGTAAGCAAAGCATGGATCTGGAGGTA…	MSGQQQQQQQQQNQQQQQQQQQNQQQQQQQQQNQQQQQQQQQNQQQQQQQQQNQQQQQQQQQNPQGAEAAAREAAAREAAAREAAARINMSAIKPDMKIKLRMEGNVNGHHFVIDGDGTGKPFEGKQSMDLEVKEGGPLPFAFDILTTAFHYGNRVFAKYPDNIQDYFKQSFPKGYSWERSLTFEDGGICNARNDITMEGDTFYNKVRFYGTNFPANGPVMQKKTLKWEPSTEKMYVRDGVLTGDVEMALLLEGNAHYRCDFRTTYKAKEKGVKLPGAHFVDHCIEILSHDKDYNKVKLYEHAVAHSGLPDNARR
1 C,E	rhx2681	N60/ Q0N	NNNNNNNNNN NNNNNNNNNN NNNNNNNNNN NNNNNNNNNN NNNNNNNNNN NNNNNNNNNN	ATGTCTGGTAACAACAATAACAACAATAACAATAACAATAATAACAACAATAATAACAATAACAACAACAATAACAATAATAATAACAATAATAACAATAATAATAATAACAACAACAATAATAATAATAATAACAATAACAATAATAATAACAACAATAATAATAATAATAATAATAATAATAATAATCCACAAGGCGCCGAAGCTGCGGCAAGAGAAGCGGCTGCACGTGAGGCCGCAGCAAGAGAGGCTGCTGCCAGAATTAATATGTCTGCCATTAAACCTGACATGAAAATCAAACTGAGAATGGAAGGAAACGTCAATGGCCATCACTTTGTAATCGACGGTGATGGTACAGGAAAACCATTCGAAGGTAAGCAAAGCATGGATCTGGAGGTA…	MSGNNNNNNNNNNNNNNNNNNNNNNNNNNNNNNNNNNNNNNNNNNNNNNNNNNNNNNNNNNNNPQGAEAAAREAAAREAAAREAAARINMSAIKPDMKIKLRMEGNVNGHHFVIDGDGTGKPFEGKQSMDLEVKEGGPLPFAFDILTTAFHYGNRVFAKYPDNIQDYFKQSFPKGYSWERSLTFEDGGICNARNDITMEGDTFYNKVRFYGTNFPANGPVMQKKTLKWEPSTEKMYVRDGVLTGDVEMALLLEGNAHYRCDFRTTYKAKEKGVKLPGAHFVDHCIEILSHDKDYNKVKLYEHAVAHSGLPDNARR
1 C; 4 A,B,D	rhx2682	Q60	QQQQQQQQQQ QQQQQQQQQQ QQQQQQQQQQ QQQQQQQQQQ QQQQQQQQQQ QQQQQQQQQQ	ATGTCTGGTCAACAGCAGCAACAGCAGCAACAGCAACAGCAACAACAGCAGCAACAACAGCAACAGCAGCAGCAACAGCAACAACAACAGCAACAACAGCAACAACAACAACAGCAGCAGCAGCAACAACAACAACAACAGCAACAACAACAGCAGCAACAACAACAACAACAACAACAACAACAACAACCGCAAGGCGCCGAAGCTGCGGCAAGAGAAGCGGCTGCACGTGAGGCCGCAGCAAGAGAGGCTGCTGCCAGAATTAATATGTCTGCCATTAAACCTGACATGAAAATCAAACTGAGAATGGAAGGAAACGTCAATGGCCATCACTTTGTAATCGACGGTGATGGTACAGGAAAACCATTCGAAGGTAAGCAAAGCATGGATCTGGAGGTA…	MSGQQQQQQQQQQQQQQQQQQQQQQQQQQQQQQQQQQQQQQQQQQQQQQQQQQQQQQQQQQQQPQGAEAAAREAAAREAAAREAAARINMSAIKPDMKIKLRMEGNVNGHHFVIDGDGTGKPFEGKQSMDLEVKEGGPLPFAFDILTTAFHYGNRVFAKYPDNIQDYFKQSFPKGYSWERSLTFEDGGICNARNDITMEGDTFYNKVRFYGTNFPANGPVMQKKTLKWEPSTEKMYVRDGVLTGDVEMALLLEGNAHYRCDFRTTYKAKEKGVKLPGAHFVDHCIEILSHDKDYNKVKLYEHAVAHSGLPDNARR
1 E	rhx2683	Q1N	QNQNQNQNQN QNQNQNQNQN QNQNQNQNQN QNQNQNQNQN QNQNQNQNQN QNQNQNQNQN	ATGTCTGGTCAAAACCAAAACCAAAATCAAAACCAAAATCAAAATCAGAACCAGAATCAAAATCAGAACCAAAACCAGAATCAGAACCAAAATCAGAACCAAAATCAAAATCAAAACCAGAATCAGAATCAAAATCAAAATCAGAATCAGAACCAAAACCAAAACCAGAACCAGAACCAGAACCAAAATCCACAAGGCGCCGAAGCTGCGGCAAGAGAAGCGGCTGCACGTGAGGCCGCAGCAAGAGAGGCTGCTGCCAGAATTAATATGTCTGCCATTAAACCTGACATGAAAATCAAACTGAGAATGGAAGGAAACGTCAATGGCCATCACTTTGTAATCGACGGTGATGGTACAGGAAAACCATTCGAAGGTAAGCAAAGCATGGATCTGGAGGTA…	MSGQNQNQNQNQNQNQNQNQNQNQNQNQNQNQNQNQNQNQNQNQNQNQNQNQNQNQNQNQNQNPQGAEAAAREAAAREAAAREAAARINMSAIKPDMKIKLRMEGNVNGHHFVIDGDGTGKPFEGKQSMDLEVKEGGPLPFAFDILTTAFHYGNRVFAKYPDNIQDYFKQSFPKGYSWERSLTFEDGGICNARNDITMEGDTFYNKVRFYGTNFPANGPVMQKKTLKWEPSTEKMYVRDGVLTGDVEMALLLEGNAHYRCDFRTTYKAKEKGVKLPGAHFVDHCIEILSHDKDYNKVKLYEHAVAHSGLPDNARR
1 E	rhx2684	Q2N	QQNQQNQQNQ QNQQNQQNQQ NQQNQQNQQN QQNQQNQQNQ QNQQNQQNQQ NQQNQQNQQN	ATGTCTGGTCAACAAAACCAACAAAACCAACAAAATCAGCAGAACCAACAAAATCAGCAAAACCAACAAAATCAACAGAACCAACAAAATCAACAAAATCAGCAGAATCAGCAGAATCAGCAAAATCAGCAAAATCAACAGAATCAGCAAAATCAACAAAATCAACAGAATCAGCAGAATCAACAAAATCCACAAGGCGCCGAAGCTGCGGCAAGAGAAGCGGCTGCACGTGAGGCCGCAGCAAGAGAGGCTGCTGCCAGAATTAATATGTCTGCCATTAAACCTGACATGAAAATCAAACTGAGAATGGAAGGAAACGTCAATGGCCATCACTTTGTAATCGACGGTGATGGTACAGGAAAACCATTCGAAGGTAAGCAAAGCATGGATCTGGAGGTA…	MSGQQNQQNQQNQQNQQNQQNQQNQQNQQNQQNQQNQQNQQNQQNQQNQQNQQNQQNQQNQQNPQGAEAAAREAAAREAAAREAAARINMSAIKPDMKIKLRMEGNVNGHHFVIDGDGTGKPFEGKQSMDLEVKEGGPLPFAFDILTTAFHYGNRVFAKYPDNIQDYFKQSFPKGYSWERSLTFEDGGICNARNDITMEGDTFYNKVRFYGTNFPANGPVMQKKTLKWEPSTEKMYVRDGVLTGDVEMALLLEGNAHYRCDFRTTYKAKEKGVKLPGAHFVDHCIEILSHDKDYNKVKLYEHAVAHSGLPDNARR
3 Supplement 1 B; 4 A,D	rhx2685	Q6N	QQQQQQNQQQ QQQNQQQQQQ NQQQQQQNQQ QQQQNQQQQQ QNQQQQQQNQ QQQQQNQQQQ	ATGTCTGGTCAGCAACAACAACAACAAAACCAGCAGCAACAACAACAAAACCAACAGCAGCAACAACAAAACCAGCAACAGCAACAACAAAACCAACAACAGCAGCAACAAAACCAGCAACAACAGCAACAAAACCAACAGCAACAGCAACAAAATCAGCAGCAGCAGCAACAAAATCAACAACAACAACCACAAGGCGCCGAAGCTGCGGCAAGAGAAGCGGCTGCACGTGAGGCCGCAGCAAGAGAGGCTGCTGCCAGAATTAATATGTCTGCCATTAAACCTGACATGAAAATCAAACTGAGAATGGAAGGAAACGTCAATGGCCATCACTTTGTAATCGACGGTGATGGTACAGGAAAACCATTCGAAGGTAAGCAAAGCATGGATCTGGAGGTA…	MSGQQQQQQNQQQQQQNQQQQQQNQQQQQQNQQQQQQNQQQQQQNQQQQQQNQQQQQQNQQQQPQGAEAAAREAAAREAAAREAAARINMSAIKPDMKIKLRMEGNVNGHHFVIDGDGTGKPFEGKQSMDLEVKEGGPLPFAFDILTTAFHYGNRVFAKYPDNIQDYFKQSFPKGYSWERSLTFEDGGICNARNDITMEGDTFYNKVRFYGTNFPANGPVMQKKTLKWEPSTEKMYVRDGVLTGDVEMALLLEGNAHYRCDFRTTYKAKEKGVKLPGAHFVDHCIEILSHDKDYNKVKLYEHAVAHSGLPDNARR
1 Supplement 1 C	rhx2686	Q1N3	NNNQNNNQNN NQNNNQNNNQ NNNQNNNQNN NQNNNQNNNQ NNNQNNNQNN NQNNNQNNNQ	ATGTCTGGTAATAATAATCAAAACAACAATCAAAATAATAACCAAAACAATAATCAAAATAACAACCAAAATAATAATCAAAACAATAACCAAAACAACAACCAAAACAACAATCAAAACAATAATCAGAACAACAACCAAAATAACAACCAGAACAACAACCAAAACAATAACCAAAATAACAACCAACCACAAGGCGCCGAAGCTGCGGCAAGAGAAGCGGCTGCACGTGAGGCCGCAGCAAGAGAGGCTGCTGCCAGAATTAATATGTCTGCCATTAAACCTGACATGAAAATCAAACTGAGAATGGAAGGAAACGTCAATGGCCATCACTTTGTAATCGACGGTGATGGTACAGGAAAACCATTCGAAGGTAAGCAAAGCATGGATCTGGAGGTA…	MSGNNNQNNNQNNNQNNNQNNNQNNNQNNNQNNNQNNNQNNNQNNNQNNNQNNNQNNNQNNNQPQGAEAAAREAAAREAAAREAAARINMSAIKPDMKIKLRMEGNVNGHHFVIDGDGTGKPFEGKQSMDLEVKEGGPLPFAFDILTTAFHYGNRVFAKYPDNIQDYFKQSFPKGYSWERSLTFEDGGICNARNDITMEGDTFYNKVRFYGTNFPANGPVMQKKTLKWEPSTEKMYVRDGVLTGDVEMALLLEGNAHYRCDFRTTYKAKEKGVKLPGAHFVDHCIEILSHDKDYNKVKLYEHAVAHSGLPDNARR
1 Supplement 1 C	rhx2687	Q1N4	NNNNQNNNNQ NNNNQNNNNQ NNNNQNNNNQ NNNNQNNNNQ NNNNQNNNNQ NNNNQNNNNQ	ATGTCTGGTAACAATAATAATCAAAACAACAATAATCAAAATAATAACAACCAAAATAATAATAATCAAAATAACAACAATCAAAACAATAACAATCAAAACAATAATAACCAAAACAACAACAACCAAAACAACAACAATCAAAATAACAATAACCAAAACAACAATAACCAAAACAATAACAACCAACCACAAGGCGCCGAAGCTGCGGCAAGAGAAGCGGCTGCACGTGAGGCCGCAGCAAGAGAGGCTGCTGCCAGAATTAATATGTCTGCCATTAAACCTGACATGAAAATCAAACTGAGAATGGAAGGAAACGTCAATGGCCATCACTTTGTAATCGACGGTGATGGTACAGGAAAACCATTCGAAGGTAAGCAAAGCATGGATCTGGAGGTA…	MSGNNNNQNNNNQNNNNQNNNNQNNNNQNNNNQNNNNQNNNNQNNNNQNNNNQNNNNQNNNNQPQGAEAAAREAAAREAAAREAAARINMSAIKPDMKIKLRMEGNVNGHHFVIDGDGTGKPFEGKQSMDLEVKEGGPLPFAFDILTTAFHYGNRVFAKYPDNIQDYFKQSFPKGYSWERSLTFEDGGICNARNDITMEGDTFYNKVRFYGTNFPANGPVMQKKTLKWEPSTEKMYVRDGVLTGDVEMALLLEGNAHYRCDFRTTYKAKEKGVKLPGAHFVDHCIEILSHDKDYNKVKLYEHAVAHSGLPDNARR
3 B,D; 3 Supplement 1 B,C; 4 A,D	rhx3071	Q8N	QQQQQQQQNQ QQQQQQQNQQ QQQQQQNQQQ QQQQQNQQQQ QQQQNQQQQQ QQQNQQQQQQ	ATGTCTGGTCAACAGCAGCAACAACAACAACAAAACCAACAGCAACAGCAGCAGCAGCAAAACCAACAGCAACAACAGCAGCAACAAAACCAACAACAGCAACAGCAACAACAAAACCAACAACAACAGCAGCAGCAACAAAATCAACAGCAACAACAGCAACAGCAGAATCAACAACAACAACAACAACCTCAAGGCGCCGAAGCTGCGGCAAGAGAAGCGGCTGCACGTGAGGCCGCAGCAAGAGAGGCTGCTGCCAGAATTAATATGTCTGCCATTAAACCTGACATGAAAATCAAACTGAGAATGGAAGGAAACGTCAATGGCCATCACTTTGTAATCGACGGTGATGGTACAGGAAAACCATTCGAAGGTAAGCAAAGCATGGATCTGGAGGTA…	MSGQQQQQQQQNQQQQQQQQNQQQQQQQQNQQQQQQQQNQQQQQQQQNQQQQQQQQNQQQQQQPQGAEAAAREAAAREAAAREAAARINMSAIKPDMKIKLRMEGNVNGHHFVIDGDGTGKPFEGKQSMDLEVKEGGPLPFAFDILTTAFHYGNRVFAKYPDNIQDYFKQSFPKGYSWERSLTFEDGGICNARNDITMEGDTFYNKVRFYGTNFPANGPVMQKKTLKWEPSTEKMYVRDGVLTGDVEMALLLEGNAHYRCDFRTTYKAKEKGVKLPGAHFVDHCIEILSHDKDYNKVKLYEHAVAHSGLPDNARR
1 E	rhx3117	Q3S	QQQSQQQSQQ QSQQQSQQQS QQQSQQQSQQ QSQQQSQQQS QQQSQQQSQQ QSQQQSQQQS	ATGTCTGGTCAACAACAATCTCAACAACAATCACAACAACAATCCCAACAACAAAGTCAGCAGCAATCCCAGCAGCAATCCCAGCAACAGTCACAACAACAAAGTCAGCAACAGTCCCAACAACAAAGTCAACAGCAGTCCCAGCAGCAATCCCAACAGCAGTCACAGCAGCAATCTCAACAACAATCTCCACAAGGCGCCGAAGCTGCGGCAAGAGAAGCGGCTGCACGTGAGGCCGCAGCAAGAGAGGCTGCTGCCAGAATTAATATGTCTGCCATTAAACCTGACATGAAAATCAAACTGAGAATGGAAGGAAACGTCAATGGCCATCACTTTGTAATCGACGGTGATGGTACAGGAAAACCATTCGAAGGTAAGCAAAGCATGGATCTGGAGGTA…	MSGQQQSQQQSQQQSQQQSQQQSQQQSQQQSQQQSQQQSQQQSQQQSQQQSQQQSQQQSQQQSPQGAEAAAREAAAREAAAREAAARINMSAIKPDMKIKLRMEGNVNGHHFVIDGDGTGKPFEGKQSMDLEVKEGGPLPFAFDILTTAFHYGNRVFAKYPDNIQDYFKQSFPKGYSWERSLTFEDGGICNARNDITMEGDTFYNKVRFYGTNFPANGPVMQKKTLKWEPSTEKMYVRDGVLTGDVEMALLLEGNAHYRCDFRTTYKAKEKGVKLPGAHFVDHCIEILSHDKDYNKVKLYEHAVAHSGLPDNARR
1 E	rhx3118	Q4S	QQQQSQQQQS QQQQSQQQQS QQQQSQQQQS QQQQSQQQQS QQQQSQQQQS QQQQSQQQQS	ATGTCTGGTCAACAACAACAATCTCAACAACAACAATCACAACAACAACAATCCCAACAACAACAAAGTCAGCAGCAGCAGTCCCAGCAGCAACAAAGTCAGCAGCAACAGTCCCAGCAACAACAAAGTCAGCAACAGCAGTCCCAGCAACAGCAAAGTCAGCAGCAGCAATCCCAGCAACAACAATCACCACAAGGCGCCGAAGCTGCGGCAAGAGAAGCGGCTGCACGTGAGGCCGCAGCAAGAGAGGCTGCTGCCAGAATTAATATGTCTGCCATTAAACCTGACATGAAAATCAAACTGAGAATGGAAGGAAACGTCAATGGCCATCACTTTGTAATCGACGGTGATGGTACAGGAAAACCATTCGAAGGTAAGCAAAGCATGGATCTGGAGGTA…	MSGQQQQSQQQQSQQQQSQQQQSQQQQSQQQQSQQQQSQQQQSQQQQSQQQQSQQQQSQQQQSPQGAEAAAREAAAREAAAREAAARINMSAIKPDMKIKLRMEGNVNGHHFVIDGDGTGKPFEGKQSMDLEVKEGGPLPFAFDILTTAFHYGNRVFAKYPDNIQDYFKQSFPKGYSWERSLTFEDGGICNARNDITMEGDTFYNKVRFYGTNFPANGPVMQKKTLKWEPSTEKMYVRDGVLTGDVEMALLLEGNAHYRCDFRTTYKAKEKGVKLPGAHFVDHCIEILSHDKDYNKVKLYEHAVAHSGLPDNARR
1 E	rhx3119	Q5S	QQQQQSQQQQ QSQQQQQSQQ QQQSQQQQQS QQQQQSQQQQ QSQQQQQSQQ QQQSQQQQQS	ATGTCTGGTCAGCAACAACAACAATCCCAACAACAACAACAATCTCAACAACAACAACAAAGTCAGCAGCAACAACAAAGTCAGCAACAGCAACAAAGTCAGCAACAACAGCAAAGTCAGCAACAACAACAGAGTCAGCAACAACAACAAAGTCAACAGCAGCAACAAAGTCAACAGCAACAGCAATCACCACAAGGCGCCGAAGCTGCGGCAAGAGAAGCGGCTGCACGTGAGGCCGCAGCAAGAGAGGCTGCTGCCAGAATTAATATGTCTGCCATTAAACCTGACATGAAAATCAAACTGAGAATGGAAGGAAACGTCAATGGCCATCACTTTGTAATCGACGGTGATGGTACAGGAAAACCATTCGAAGGTAAGCAAAGCATGGATCTGGAGGTA…	MSGQQQQQSQQQQQSQQQQQSQQQQQSQQQQQSQQQQQSQQQQQSQQQQQSQQQQQSQQQQQSPQGAEAAAREAAAREAAAREAAARINMSAIKPDMKIKLRMEGNVNGHHFVIDGDGTGKPFEGKQSMDLEVKEGGPLPFAFDILTTAFHYGNRVFAKYPDNIQDYFKQSFPKGYSWERSLTFEDGGICNARNDITMEGDTFYNKVRFYGTNFPANGPVMQKKTLKWEPSTEKMYVRDGVLTGDVEMALLLEGNAHYRCDFRTTYKAKEKGVKLPGAHFVDHCIEILSHDKDYNKVKLYEHAVAHSGLPDNARR
1 E; 3 C	rhx3265	Q3A	QQQAQQQAQQ QAQQQAQQQA QQQAQQQAQQ QAQQQAQQQA QQQAQQQAQQ QAQQQAQQQA	ATGTCTGGTCAACAACAAGCTCAACAACAAGCACAACAACAAGCCCAGCAGCAAGCCCAACAACAAGCCCAGCAACAGGCCCAACAACAAGCCCAACAGCAGGCCCAGCAGCAAGCACAGCAGCAAGCACAGCAACAGGCACAACAACAAGCCCAACAACAGGCTCAGCAGCAAGCTCAACAACAAGCTCCACAAGGCGCCGAAGCTGCGGCAAGAGAAGCGGCTGCACGTGAGGCCGCAGCAAGAGAGGCTGCTGCCAGAATTAATATGTCTGCCATTAAACCTGACATGAAAATCAAACTGAGAATGGAAGGAAACGTCAATGGCCATCACTTTGTAATCGACGGTGATGGTACAGGAAAACCATTCGAAGGTAAGCAAAGCATGGATCTGGAGGTA…	MSGQQQAQQQAQQQAQQQAQQQAQQQAQQQAQQQAQQQAQQQAQQQAQQQAQQQAQQQAQQQAPQGAEAAAREAAAREAAAREAAARINMSAIKPDMKIKLRMEGNVNGHHFVIDGDGTGKPFEGKQSMDLEVKEGGPLPFAFDILTTAFHYGNRVFAKYPDNIQDYFKQSFPKGYSWERSLTFEDGGICNARNDITMEGDTFYNKVRFYGTNFPANGPVMQKKTLKWEPSTEKMYVRDGVLTGDVEMALLLEGNAHYRCDFRTTYKAKEKGVKLPGAHFVDHCIEILSHDKDYNKVKLYEHAVAHSGLPDNARR
1 E; 3 C	rhx3266	Q4A	QQQQAQQQQA QQQQAQQQQA QQQQAQQQQA QQQQAQQQQA QQQQAQQQQA QQQQAQQQQA	ATGTCTGGTCAACAACAACAAGCTCAACAACAACAAGCACAACAACAACAAGCCCAGCAGCAACAAGCCCAACAACAGCAGGCCCAACAACAACAAGCCCAACAGCAGCAAGCCCAGCAACAGCAAGCCCAGCAACAACAGGCACAGCAGCAGCAGGCACAGCAGCAGCAAGCCCAACAACAACAAGCACCACAAGGCGCCGAAGCTGCGGCAAGAGAAGCGGCTGCACGTGAGGCCGCAGCAAGAGAGGCTGCTGCCAGAATTAATATGTCTGCCATTAAACCTGACATGAAAATCAAACTGAGAATGGAAGGAAACGTCAATGGCCATCACTTTGTAATCGACGGTGATGGTACAGGAAAACCATTCGAAGGTAAGCAAAGCATGGATCTGGAGGTA…	MSGQQQQAQQQQAQQQQAQQQQAQQQQAQQQQAQQQQAQQQQAQQQQAQQQQAQQQQAQQQQAPQGAEAAAREAAAREAAAREAAARINMSAIKPDMKIKLRMEGNVNGHHFVIDGDGTGKPFEGKQSMDLEVKEGGPLPFAFDILTTAFHYGNRVFAKYPDNIQDYFKQSFPKGYSWERSLTFEDGGICNARNDITMEGDTFYNKVRFYGTNFPANGPVMQKKTLKWEPSTEKMYVRDGVLTGDVEMALLLEGNAHYRCDFRTTYKAKEKGVKLPGAHFVDHCIEILSHDKDYNKVKLYEHAVAHSGLPDNARR
1 E; 3 C	rhx3267	Q5A	QQQQQAQQQQ QAQQQQQAQQ QQQAQQQQQA QQQQQAQQQQ QAQQQQQAQQ QQQAQQQQQA	ATGTCTGGTCAGCAACAACAACAAGCCCAACAACAACAACAAGCTCAGCAGCAACAACAAGCACAACAACAGCAGCAAGCACAACAACAGCAACAGGCACAACAACAGCAACAAGCTCAGCAACAGCAACAAGCACAACAACAACAGCAGGCACAACAACAACAGCAAGCACAGCAACAACAACAAGCACCACAAGGCGCCGAAGCTGCGGCAAGAGAAGCGGCTGCACGTGAGGCCGCAGCAAGAGAGGCTGCTGCCAGAATTAATATGTCTGCCATTAAACCTGACATGAAAATCAAACTGAGAATGGAAGGAAACGTCAATGGCCATCACTTTGTAATCGACGGTGATGGTACAGGAAAACCATTCGAAGGTAAGCAAAGCATGGATCTGGAGGTA…	MSGQQQQQAQQQQQAQQQQQAQQQQQAQQQQQAQQQQQAQQQQQAQQQQQAQQQQQAQQQQQAPQGAEAAAREAAAREAAAREAAARINMSAIKPDMKIKLRMEGNVNGHHFVIDGDGTGKPFEGKQSMDLEVKEGGPLPFAFDILTTAFHYGNRVFAKYPDNIQDYFKQSFPKGYSWERSLTFEDGGICNARNDITMEGDTFYNKVRFYGTNFPANGPVMQKKTLKWEPSTEKMYVRDGVLTGDVEMALLLEGNAHYRCDFRTTYKAKEKGVKLPGAHFVDHCIEILSHDKDYNKVKLYEHAVAHSGLPDNARR
1 E	rhx4276	Q3H	QQQHQQQHQQ QHQQQHQQQH QQQHQQQHQQ QHQQQHQQQH QQQHQQQHQQ QHQQQHQQQH	ATGTCTGGTCAACAACAACACCAGCAGCAACACCAACAACAACATCAACAACAACACCAACAGCAGCACCAACAACAACACCAGCAACAGCACCAGCAGCAACATCAGCAGCAACATCAGCAACAGCATCAGCAGCAACATCAACAGCAGCATCAGCAACAGCATCAACAGCAGCATCAACAGCAACACCCTCAAGGCGCCGAAGCTGCGGCAAGAGAAGCGGCTGCACGTGAGGCCGCAGCAAGAGAGGCTGCTGCCAGAATTAATATGTCTGCCATTAAACCTGACATGAAAATCAAACTGAGAATGGAAGGAAACGTCAATGGCCATCACTTTGTAATCGACGGTGATGGTACAGGAAAACCATTCGAAGGTAAGCAAAGCATGGATCTGGAGGTA…	MSGQQQHQQQHQQQHQQQHQQQHQQQHQQQHQQQHQQQHQQQHQQQHQQQHQQQHQQQHQQQHPQGAEAAAREAAAREAAAREAAARINMSAIKPDMKIKLRMEGNVNGHHFVIDGDGTGKPFEGKQSMDLEVKEGGPLPFAFDILTTAFHYGNRVFAKYPDNIQDYFKQSFPKGYSWERSLTFEDGGICNARNDITMEGDTFYNKVRFYGTNFPANGPVMQKKTLKWEPSTEKMYVRDGVLTGDVEMALLLEGNAHYRCDFRTTYKAKEKGVKLPGAHFVDHCIEILSHDKDYNKVKLYEHAVAHSGLPDNARR
1 E	rhx4277	Q4H	QQQQHQQQQH QQQQHQQQQH QQQQHQQQQH QQQQHQQQQH QQQQHQQQQH QQQQHQQQQH	ATGTCTGGTCAGCAGCAACAACATCAACAACAGCAGCATCAACAACAACAACATCAACAGCAGCAACATCAGCAACAGCAACATCAGCAACAACAGCACCAACAACAACAACACCAACAGCAGCAACATCAACAGCAACAGCATCAGCAGCAGCAGCACCAGCAACAGCAGCACCAGCAACAACAACATCCACAAGGCGCCGAAGCTGCGGCAAGAGAAGCGGCTGCACGTGAGGCCGCAGCAAGAGAGGCTGCTGCCAGAATTAATATGTCTGCCATTAAACCTGACATGAAAATCAAACTGAGAATGGAAGGAAACGTCAATGGCCATCACTTTGTAATCGACGGTGATGGTACAGGAAAACCATTCGAAGGTAAGCAAAGCATGGATCTGGAGGTA…	MSGQQQQHQQQQHQQQQHQQQQHQQQQHQQQQHQQQQHQQQQHQQQQHQQQQHQQQQHQQQQHPQGAEAAAREAAAREAAAREAAARINMSAIKPDMKIKLRMEGNVNGHHFVIDGDGTGKPFEGKQSMDLEVKEGGPLPFAFDILTTAFHYGNRVFAKYPDNIQDYFKQSFPKGYSWERSLTFEDGGICNARNDITMEGDTFYNKVRFYGTNFPANGPVMQKKTLKWEPSTEKMYVRDGVLTGDVEMALLLEGNAHYRCDFRTTYKAKEKGVKLPGAHFVDHCIEILSHDKDYNKVKLYEHAVAHSGLPDNARR
1 E	rhx4278	Q5H	QQQQQHQQQQ QHQQQQQHQQ QQQHQQQQQH QQQQQHQQQQ QHQQQQQHQQ QQQHQQQQQH	ATGTCTGGTCAACAACAACAACAACACCAGCAGCAACAACAGCACCAACAACAACAACAACATCAGCAGCAACAACAACATCAGCAACAGCAACAACATCAGCAACAACAGCAACATCAGCAACAACAACAGCATCAGCAACAACAACAACATCAACAGCAGCAACAACATCAACAGCAACAGCAACATCCACAAGGCGCCGAAGCTGCGGCAAGAGAAGCGGCTGCACGTGAGGCCGCAGCAAGAGAGGCTGCTGCCAGAATTAATATGTCTGCCATTAAACCTGACATGAAAATCAAACTGAGAATGGAAGGAAACGTCAATGGCCATCACTTTGTAATCGACGGTGATGGTACAGGAAAACCATTCGAAGGTAAGCAAAGCATGGATCTGGAGGTA…	MSGQQQQQHQQQQQHQQQQQHQQQQQHQQQQQHQQQQQHQQQQQHQQQQQHQQQQQHQQQQQHPQGAEAAAREAAAREAAAREAAARINMSAIKPDMKIKLRMEGNVNGHHFVIDGDGTGKPFEGKQSMDLEVKEGGPLPFAFDILTTAFHYGNRVFAKYPDNIQDYFKQSFPKGYSWERSLTFEDGGICNARNDITMEGDTFYNKVRFYGTNFPANGPVMQKKTLKWEPSTEKMYVRDGVLTGDVEMALLLEGNAHYRCDFRTTYKAKEKGVKLPGAHFVDHCIEILSHDKDYNKVKLYEHAVAHSGLPDNARR
1 E	rhx3453	Q3G	QQQGQQQGQQ QGQQQGQQQG QQQGQQQGQQ QGQQQGQQQG QQQGQQQGQQ QGQQQGQQQG	ATGTCTGGTCAACAACAAGGCCAGCAACAAGGTCAACAGCAGGGTCAACAACAAGGCCAACAGCAAGGTCAACAACAGGGCCAACAACAAGGTCAGCAGCAAGGTCAACAACAAGGACAGCAACAAGGTCAACAACAGGGACAACAACAAGGTCAGCAACAGGGTCAACAACAAGGTCAACAACAAGGTCCACAAGGCGCCGAAGCTGCGGCAAGAGAAGCGGCTGCACGTGAGGCCGCAGCAAGAGAGGCTGCTGCCAGAATTAATATGTCTGCCATTAAACCTGACATGAAAATCAAACTGAGAATGGAAGGAAACGTCAATGGCCATCACTTTGTAATCGACGGTGATGGTACAGGAAAACCATTCGAAGGTAAGCAAAGCATGGATCTGGAGGTA…	MSGQQQGQQQGQQQGQQQGQQQGQQQGQQQGQQQGQQQGQQQGQQQGQQQGQQQGQQQGQQQGPQGAEAAAREAAAREAAAREAAARINMSAIKPDMKIKLRMEGNVNGHHFVIDGDGTGKPFEGKQSMDLEVKEGGPLPFAFDILTTAFHYGNRVFAKYPDNIQDYFKQSFPKGYSWERSLTFEDGGICNARNDITMEGDTFYNKVRFYGTNFPANGPVMQKKTLKWEPSTEKMYVRDGVLTGDVEMALLLEGNAHYRCDFRTTYKAKEKGVKLPGAHFVDHCIEILSHDKDYNKVKLYEHAVAHSGLPDNARR
1 E	rhx3454	Q4G	QQQQGQQQQG QQQQGQQQQG QQQQGQQQQG QQQQGQQQQG QQQQGQQQQG QQQQGQQQQG	ATGTCTGGTCAACAACAACAAGGCCAGCAACAACAAGGTCAACAGCAGCAAGGTCAACAACAACAGGGCCAACAACAACAAGGTCAGCAGCAGCAGGGCCAGCAGCAACAAGGTCAACAACAGCAGGGCCAGCAACAGCAGGGCCAACAGCAGCAGGGCCAGCAACAACAGGGTCAACAACAACAAGGTCCACAAGGCGCCGAAGCTGCGGCAAGAGAAGCGGCTGCACGTGAGGCCGCAGCAAGAGAGGCTGCTGCCAGAATTAATATGTCTGCCATTAAACCTGACATGAAAATCAAACTGAGAATGGAAGGAAACGTCAATGGCCATCACTTTGTAATCGACGGTGATGGTACAGGAAAACCATTCGAAGGTAAGCAAAGCATGGATCTGGAGGTA…	MSGQQQQGQQQQGQQQQGQQQQGQQQQGQQQQGQQQQGQQQQGQQQQGQQQQGQQQQGQQQQGPQGAEAAAREAAAREAAAREAAARINMSAIKPDMKIKLRMEGNVNGHHFVIDGDGTGKPFEGKQSMDLEVKEGGPLPFAFDILTTAFHYGNRVFAKYPDNIQDYFKQSFPKGYSWERSLTFEDGGICNARNDITMEGDTFYNKVRFYGTNFPANGPVMQKKTLKWEPSTEKMYVRDGVLTGDVEMALLLEGNAHYRCDFRTTYKAKEKGVKLPGAHFVDHCIEILSHDKDYNKVKLYEHAVAHSGLPDNARR
1 E	rhx3455	Q5G	QQQQQGQQQQ QGQQQQQGQQ QQQGQQQQQG QQQQQGQQQQ QGQQQQQGQQ QQQGQQQQQG	ATGTCTGGTCAACAACAACAACAAGGCCAGCAACAACAACAAGGCCAACAGCAACAACAAGGCCAACAACAGCAACAAGGCCAACAACAACAGCAAGGCCAACAACAACAACAGGGCCAGCAGCAACAACAAGGACAGCAACAACAACAAGGACAACAGCAACAACAAGGACAACAACAGCAACAAGGTCCACAAGGCGCCGAAGCTGCGGCAAGAGAAGCGGCTGCACGTGAGGCCGCAGCAAGAGAGGCTGCTGCCAGAATTAATATGTCTGCCATTAAACCTGACATGAAAATCAAACTGAGAATGGAAGGAAACGTCAATGGCCATCACTTTGTAATCGACGGTGATGGTACAGGAAAACCATTCGAAGGTAAGCAAAGCATGGATCTGGAGGTA…	MSGQQQQQGQQQQQGQQQQQGQQQQQGQQQQQGQQQQQGQQQQQGQQQQQGQQQQQGQQQQQGPQGAEAAAREAAAREAAAREAAARINMSAIKPDMKIKLRMEGNVNGHHFVIDGDGTGKPFEGKQSMDLEVKEGGPLPFAFDILTTAFHYGNRVFAKYPDNIQDYFKQSFPKGYSWERSLTFEDGGICNARNDITMEGDTFYNKVRFYGTNFPANGPVMQKKTLKWEPSTEKMYVRDGVLTGDVEMALLLEGNAHYRCDFRTTYKAKEKGVKLPGAHFVDHCIEILSHDKDYNKVKLYEHAVAHSGLPDNARR
3 Supplement 1 A	rhx3989	Q60	QQQQQQQQQQ QQQQQQQQQQ QQQQQQQQQQ QQQQQQQQQQ QQQQQQQQQQ QQQQQQQQQQ	ATGTCTGCCATTAAACCTGACATGAAAATCAAACTGAGAATGGAAGGAAACGTCAATGGCCATCACTTTGTAATCGACGGTGATGGTACAGGAAAACCATTCGAAGGTAAGCAAAGCATGGATCTGGAGGTAAAAGAGGGTGGCCCACTCCCATTTGCATTCGATATCTTAACCACCGCCTTTCATTACGGTAACAGAGTTTTTGCAAAGTATCCTGATAACATTCAAGATTATTTCAAACAGTCATTTCCAAAGGGTTACAGTTGGGAAAGAAGCCTAACATTTGAAGATGGCGGTATTTGTAATGCTAGAAATGATATTACAATGGAGGGTGACACTTTCTACAATAAGGTAAGATTTTATGGAACAAATTTCCCTGCTAACGGACCTGTTATGCAA…	MSAIKPDMKIKLRMEGNVNGHHFVIDGDGTGKPFEGKQSMDLEVKEGGPLPFAFDILTTAFHYGNRVFAKYPDNIQDYFKQSFPKGYSWERSLTFEDGGICNARNDITMEGDTFYNKVRFYGTNFPANGPVMQKKTLKWEPSTEKMYVRDGVLTGDVEMALLLEGNAHYRCDFRTTYKAKEKGVKLPGAHFVDHCIEILSHDKDYNKVKLYEHAVAHSGLPDNARRGAPEAAAREAAAREAAAREAAARMSGQQQQQQQQQQQQQQQQQQQQQQQQQQQQQQQQQQQQQQQQQQQQQQQQQQQQQQQQQQQQPQ
3 Supplement 1 A	rhx4710	Q3N	QQQNQQQNQQ QNQQQNQQQN QQQNQQQNQQ QNQQQNQQQN QQQNQQQNQQ QNQQQNQQQN	ATGTCTGCCATTAAACCTGACATGAAAATCAAACTGAGAATGGAAGGAAACGTCAATGGCCATCACTTTGTAATCGACGGTGATGGTACAGGAAAACCATTCGAAGGTAAGCAAAGCATGGATCTGGAGGTAAAAGAGGGTGGCCCACTCCCATTTGCATTCGATATCTTAACCACCGCCTTTCATTACGGTAACAGAGTTTTTGCAAAGTATCCTGATAACATTCAAGATTATTTCAAACAGTCATTTCCAAAGGGTTACAGTTGGGAAAGAAGCCTAACATTTGAAGATGGCGGTATTTGTAATGCTAGAAATGATATTACAATGGAGGGTGACACTTTCTACAATAAGGTAAGATTTTATGGAACAAATTTCCCTGCTAACGGACCTGTTATGCAA…	MSAIKPDMKIKLRMEGNVNGHHFVIDGDGTGKPFEGKQSMDLEVKEGGPLPFAFDILTTAFHYGNRVFAKYPDNIQDYFKQSFPKGYSWERSLTFEDGGICNARNDITMEGDTFYNKVRFYGTNFPANGPVMQKKTLKWEPSTEKMYVRDGVLTGDVEMALLLEGNAHYRCDFRTTYKAKEKGVKLPGAHFVDHCIEILSHDKDYNKVKLYEHAVAHSGLPDNARRGAPEAAAREAAAREAAAREAAARMSGQQQNQQQNQQQNQQQNQQQNQQQNQQQNQQQNQQQNQQQNQQQNQQQNQQQNQQQNQQQNPQ
3 Supplement 1 A	rhx4068	Q7N	QQQQQQQNQQ QQQQQNQQQQ QQQNQQQQQQ QNQQQQQQQN QQQQQQQNQQ QQQQQNQQQQ	ATGTCTGCCATTAAACCTGACATGAAAATCAAACTGAGAATGGAAGGAAACGTCAATGGCCATCACTTTGTAATCGACGGTGATGGTACAGGAAAACCATTCGAAGGTAAGCAAAGCATGGATCTGGAGGTAAAAGAGGGTGGCCCACTCCCATTTGCATTCGATATCTTAACCACCGCCTTTCATTACGGTAACAGAGTTTTTGCAAAGTATCCTGATAACATTCAAGATTATTTCAAACAGTCATTTCCAAAGGGTTACAGTTGGGAAAGAAGCCTAACATTTGAAGATGGCGGTATTTGTAATGCTAGAAATGATATTACAATGGAGGGTGACACTTTCTACAATAAGGTAAGATTTTATGGAACAAATTTCCCTGCTAACGGACCTGTTATGCAA…	MSAIKPDMKIKLRMEGNVNGHHFVIDGDGTGKPFEGKQSMDLEVKEGGPLPFAFDILTTAFHYGNRVFAKYPDNIQDYFKQSFPKGYSWERSLTFEDGGICNARNDITMEGDTFYNKVRFYGTNFPANGPVMQKKTLKWEPSTEKMYVRDGVLTGDVEMALLLEGNAHYRCDFRTTYKAKEKGVKLPGAHFVDHCIEILSHDKDYNKVKLYEHAVAHSGLPDNARRGAPEAAAREAAAREAAAREAAARMSGQQQQQQQNQQQQQQQNQQQQQQQNQQQQQQQNQQQQQQQNQQQQQQQNQQQQQQQNQQQQPQ
3 Supplement 1 A	rhx4584	Q60	QQQQQQQQQQ QQQQQQQQQQ QQQQQQQQQQ QQQQQQQQQQ QQQQQQQQQQ QQQQQQQQQQ	ATGTCTGGTCAACAGCAGCAACAGCAGCAACAGCAACAGCAACAACAGCAGCAACAACAGCAACAGCAGCAGCAACAGCAACAACAACAGCAACAACAGCAACAACAACAACAGCAGCAGCAGCAACAACAACAACAACAGCAACAACAACAGCAGCAACAACAACAACAACAACAACAACAACAACAACCGCAAGGTGGTGGTGGTTCTGGTGGTGGTGGTTCTGGTGGTGGTGGTTCTATTAATATGTCTGCCATTAAACCTGACATGAAAATCAAACTGAGAATGGAAGGAAACGTCAATGGCCATCACTTTGTAATCGACGGTGATGGTACAGGAAAACCATTCGAAGGTAAGCAAAGCATGGATCTGGAGGTAAAAGAGGGTGGCCCACTCCCA…	MSGQQQQQQQQQQQQQQQQQQQQQQQQQQQQQQQQQQQQQQQQQQQQQQQQQQQQQQQQQQQQPQGGGGSGGGGSGGGGSINMSAIKPDMKIKLRMEGNVNGHHFVIDGDGTGKPFEGKQSMDLEVKEGGPLPFAFDILTTAFHYGNRVFAKYPDNIQDYFKQSFPKGYSWERSLTFEDGGICNARNDITMEGDTFYNKVRFYGTNFPANGPVMQKKTLKWEPSTEKMYVRDGVLTGDVEMALLLEGNAHYRCDFRTTYKAKEKGVKLPGAHFVDHCIEILSHDKDYNKVKLYEHAVAHSGLPDNARR
3 Supplement 1 A	rhx4585	Q3N	QQQNQQQNQQ QNQQQNQQQN QQQNQQQNQQ QNQQQNQQQN QQQNQQQNQQ QNQQQNQQQN	ATGTCTGGTCAACAACAAAACCAACAACAAAATCAGCAGCAAAATCAACAACAGAACCAACAACAAAATCAACAGCAGAATCAACAACAAAATCAGCAACAGAATCAGCAGCAAAACCAGCAGCAAAACCAGCAACAGAACCAGCAACAAAATCAACAGCAAAACCAGCAACAAAACCAGCAACAAAATCCACAAGGTGGTGGTGGTTCTGGTGGTGGTGGTTCTGGTGGTGGTGGTTCTATTAATATGTCTGCCATTAAACCTGACATGAAAATCAAACTGAGAATGGAAGGAAACGTCAATGGCCATCACTTTGTAATCGACGGTGATGGTACAGGAAAACCATTCGAAGGTAAGCAAAGCATGGATCTGGAGGTAAAAGAGGGTGGCCCACTCCCA…	MSGQQQNQQQNQQQNQQQNQQQNQQQNQQQNQQQNQQQNQQQNQQQNQQQNQQQNQQQNQQQNPQGGGGSGGGGSGGGGSINMSAIKPDMKIKLRMEGNVNGHHFVIDGDGTGKPFEGKQSMDLEVKEGGPLPFAFDILTTAFHYGNRVFAKYPDNIQDYFKQSFPKGYSWERSLTFEDGGICNARNDITMEGDTFYNKVRFYGTNFPANGPVMQKKTLKWEPSTEKMYVRDGVLTGDVEMALLLEGNAHYRCDFRTTYKAKEKGVKLPGAHFVDHCIEILSHDKDYNKVKLYEHAVAHSGLPDNARR
3 Supplement 1 A	rhx4586	Q7N	QQQQQQQNQQ QQQQQNQQQQ QQQNQQQQQQ QNQQQQQQQN QQQQQQQNQQ QQQQQNQQQQ	ATGTCTGGTCAACAGCAGCAACAACAACAAAACCAACAGCAACAGCAACAACAAAACCAACAACAGCAGCAGCAACAAAACCAACAACAACAGCAGCAACAAAATCAACAGCAACAACAGCAACAAAATCAACAACAGCAACAGCAGCAAAACCAACAGCAACAACAACAGCAAAATCAGCAACAACAACCTCAAGGTGGTGGTGGTTCTGGTGGTGGTGGTTCTGGTGGTGGTGGTTCTATTAATATGTCTGCCATTAAACCTGACATGAAAATCAAACTGAGAATGGAAGGAAACGTCAATGGCCATCACTTTGTAATCGACGGTGATGGTACAGGAAAACCATTCGAAGGTAAGCAAAGCATGGATCTGGAGGTAAAAGAGGGTGGCCCACTCCCA…	MSGQQQQQQQNQQQQQQQNQQQQQQQNQQQQQQQNQQQQQQQNQQQQQQQNQQQQQQQNQQQQPQGGGGSGGGGSGGGGSINMSAIKPDMKIKLRMEGNVNGHHFVIDGDGTGKPFEGKQSMDLEVKEGGPLPFAFDILTTAFHYGNRVFAKYPDNIQDYFKQSFPKGYSWERSLTFEDGGICNARNDITMEGDTFYNKVRFYGTNFPANGPVMQKKTLKWEPSTEKMYVRDGVLTGDVEMALLLEGNAHYRCDFRTTYKAKEKGVKLPGAHFVDHCIEILSHDKDYNKVKLYEHAVAHSGLPDNARR
4 Supplement 1 B	rhx3450	Q3NQ3N2	QQQNQQQNNQ QQNQQQNNQQ QNQQQNNQQQ NQQQNNQQQN QQQNNQQQNQ QQNNQQQNQQ	ATGTCTGGTCAACAACAAAATCAACAACAAAATAACCAACAACAAAACCAACAACAAAATAATCAGCAGCAAAACCAACAACAAAACAACCAGCAGCAAAATCAACAACAAAACAACCAACAGCAGAATCAACAACAAAATAATCAACAGCAGAACCAACAACAAAACAATCAGCAACAGAACCAACAACCACAAGGCGCCGAAGCTGCGGCAAGAGAAGCGGCTGCACGTGAGGCCGCAGCAAGAGAGGCTGCTGCCAGAATTAATATGTCTGCCATTAAACCTGACATGAAAATCAAACTGAGAATGGAAGGAAACGTCAATGGCCATCACTTTGTAATCGACGGTGATGGTACAGGAAAACCATTCGAAGGTAAGCAAAGCATGGATCTGGAGGTA…	MSGQQQNQQQNNQQQNQQQNNQQQNQQQNNQQQNQQQNNQQQNQQQNNQQQNQQQNNQQQNQQPQGAEAAAREAAAREAAAREAAARINMSAIKPDMKIKLRMEGNVNGHHFVIDGDGTGKPFEGKQSMDLEVKEGGPLPFAFDILTTAFHYGNRVFAKYPDNIQDYFKQSFPKGYSWERSLTFEDGGICNARNDITMEGDTFYNKVRFYGTNFPANGPVMQKKTLKWEPSTEKMYVRDGVLTGDVEMALLLEGNAHYRCDFRTTYKAKEKGVKLPGAHFVDHCIEILSHDKDYNKVKLYEHAVAHSGLPDNARR
4 Supplement 1 B	rhx3451	Q3NQ3NQ3N2	QQQNQQQNQQ QNNQQQNQQQ NQQQNNQQQN QQQNQQQNNQ QQNQQQNQQQ NNQQQNQQQN	ATGTCTGGTCAACAACAAAACCAACAACAAAATCAACAACAAAACAATCAGCAGCAAAATCAGCAGCAAAATCAACAACAAAATAATCAGCAACAGAATCAGCAACAGAACCAACAACAAAACAATCAACAGCAGAATCAGCAACAGAATCAACAACAAAATAACCAGCAGCAAAACCAACAACAAAACCCACAAGGCGCCGAAGCTGCGGCAAGAGAAGCGGCTGCACGTGAGGCCGCAGCAAGAGAGGCTGCTGCCAGAATTAATATGTCTGCCATTAAACCTGACATGAAAATCAAACTGAGAATGGAAGGAAACGTCAATGGCCATCACTTTGTAATCGACGGTGATGGTACAGGAAAACCATTCGAAGGTAAGCAAAGCATGGATCTGGAGGTA…	MSGQQQNQQQNQQQNNQQQNQQQNQQQNNQQQNQQQNQQQNNQQQNQQQNQQQNNQQQNQQQNPQGAEAAAREAAAREAAAREAAARINMSAIKPDMKIKLRMEGNVNGHHFVIDGDGTGKPFEGKQSMDLEVKEGGPLPFAFDILTTAFHYGNRVFAKYPDNIQDYFKQSFPKGYSWERSLTFEDGGICNARNDITMEGDTFYNKVRFYGTNFPANGPVMQKKTLKWEPSTEKMYVRDGVLTGDVEMALLLEGNAHYRCDFRTTYKAKEKGVKLPGAHFVDHCIEILSHDKDYNKVKLYEHAVAHSGLPDNARR
4 Supplement 1 B	rhx3452	Q3NQ3NQ3NQ3N2	QQQNQQQNQQ QNQQQNNQQQ NQQQNQQQNQ QQNNQQQNQQ QNQQQNQQQN NQQQNQQQNQ	ATGTCTGGTCAACAACAAAATCAACAACAAAACCAGCAGCAAAACCAACAACAAAATAACCAACAACAAAACCAGCAACAGAACCAACAACAAAACCAACAACAAAACAACCAGCAGCAAAATCAGCAGCAAAATCAGCAACAGAATCAACAACAAAATAATCAGCAACAGAACCAGCAACAAAATCAACCACAAGGCGCCGAAGCTGCGGCAAGAGAAGCGGCTGCACGTGAGGCCGCAGCAAGAGAGGCTGCTGCCAGAATTAATATGTCTGCCATTAAACCTGACATGAAAATCAAACTGAGAATGGAAGGAAACGTCAATGGCCATCACTTTGTAATCGACGGTGATGGTACAGGAAAACCATTCGAAGGTAAGCAAAGCATGGATCTGGAGGTA…	MSGQQQNQQQNQQQNQQQNNQQQNQQQNQQQNQQQNNQQQNQQQNQQQNQQQNNQQQNQQQNQPQGAEAAAREAAAREAAAREAAARINMSAIKPDMKIKLRMEGNVNGHHFVIDGDGTGKPFEGKQSMDLEVKEGGPLPFAFDILTTAFHYGNRVFAKYPDNIQDYFKQSFPKGYSWERSLTFEDGGICNARNDITMEGDTFYNKVRFYGTNFPANGPVMQKKTLKWEPSTEKMYVRDGVLTGDVEMALLLEGNAHYRCDFRTTYKAKEKGVKLPGAHFVDHCIEILSHDKDYNKVKLYEHAVAHSGLPDNARR
4 Supplement 1 C	rhx2608	Q4N2	QQQQNNQQQQ NNQQQQNNQQ QQNNQQQQNN QQQQNNQQQQ NNQQQQNNQQ QQNNQQQQNN	ATGTCTGGTCAACAACAACAAAATAACCAACAACAACAAAACAACCAGCAGCAACAAAACAACCAACAACAACAAAATAATCAGCAGCAGCAGAACAACCAGCAACAACAAAATAATCAACAGCAGCAGAACAACCAACAGCAACAAAATAATCAGCAACAGCAGAACAACCAACAACAGCAAAATAATCCACAAGGCGCCGAAGCTGCGGCAAGAGAAGCGGCTGCACGTGAGGCCGCAGCAAGAGAGGCTGCTGCCAGAATTAATATGTCTGCCATTAAACCTGACATGAAAATCAAACTGAGAATGGAAGGAAACGTCAATGGCCATCACTTTGTAATCGACGGTGATGGTACAGGAAAACCATTCGAAGGTAAGCAAAGCATGGATCTGGAGGTA…	MSGQQQQNNQQQQNNQQQQNNQQQQNNQQQQNNQQQQNNQQQQNNQQQQNNQQQQNNQQQQNNPQGAEAAAREAAAREAAAREAAARINMSAIKPDMKIKLRMEGNVNGHHFVIDGDGTGKPFEGKQSMDLEVKEGGPLPFAFDILTTAFHYGNRVFAKYPDNIQDYFKQSFPKGYSWERSLTFEDGGICNARNDITMEGDTFYNKVRFYGTNFPANGPVMQKKTLKWEPSTEKMYVRDGVLTGDVEMALLLEGNAHYRCDFRTTYKAKEKGVKLPGAHFVDHCIEILSHDKDYNKVKLYEHAVAHSGLPDNARR
4 Supplement 1 C	rhx3789	Q6N2	QQQQQQNNQQ QQQQNNQQQQ QQNNQQQQQQ NNQQQQQQNN QQQQQQNNQQ QQQQNNQQQQ	ATGTCTGGTCAGCAACAACAACAACAAAACAACCAGCAGCAACAACAACAAAACAATCAGCAGCAGCAGCAACAAAATAACCAGCAACAGCAACAACAAAATAACCAACAGCAGCAACAACAAAATAATCAGCAGCAGCAACAGCAAAATAACCAGCAACAACAGCAACAAAATAATCAACAACAACAACCACAAGGCGCCGAAGCTGCGGCAAGAGAAGCGGCTGCACGTGAGGCCGCAGCAAGAGAGGCTGCTGCCAGAATTAATATGTCTGCCATTAAACCTGACATGAAAATCAAACTGAGAATGGAAGGAAACGTCAATGGCCATCACTTTGTAATCGACGGTGATGGTACAGGAAAACCATTCGAAGGTAAGCAAAGCATGGATCTGGAGGTA…	MSGQQQQQQNNQQQQQQNNQQQQQQNNQQQQQQNNQQQQQQNNQQQQQQNNQQQQQQNNQQQQPQGAEAAAREAAAREAAAREAAARINMSAIKPDMKIKLRMEGNVNGHHFVIDGDGTGKPFEGKQSMDLEVKEGGPLPFAFDILTTAFHYGNRVFAKYPDNIQDYFKQSFPKGYSWERSLTFEDGGICNARNDITMEGDTFYNKVRFYGTNFPANGPVMQKKTLKWEPSTEKMYVRDGVLTGDVEMALLLEGNAHYRCDFRTTYKAKEKGVKLPGAHFVDHCIEILSHDKDYNKVKLYEHAVAHSGLPDNARR
4 Supplement 1 C	rhx2609	Q8N2	QQQQQQQQNN QQQQQQQQNN QQQQQQQQNN QQQQQQQQNN QQQQQQQQNN QQQQQQQQNN	ATGTCTGGTCAACAGCAGCAACAACAACAACAAAACAATCAACAGCAACAGCAGCAGCAGCAAAATAATCAACAGCAACAGCAACAGCAACAAAATAATCAACAACAGCAGCAGCAACAACAAAATAACCAACAGCAACAACAGCAGCAACAAAACAACCAACAGCAACAACAACAGCAGCAAAATAATCCACAAGGCGCCGAAGCTGCGGCAAGAGAAGCGGCTGCACGTGAGGCCGCAGCAAGAGAGGCTGCTGCCAGAATTAATATGTCTGCCATTAAACCTGACATGAAAATCAAACTGAGAATGGAAGGAAACGTCAATGGCCATCACTTTGTAATCGACGGTGATGGTACAGGAAAACCATTCGAAGGTAAGCAAAGCATGGATCTGGAGGTA…	MSGQQQQQQQQNNQQQQQQQQNNQQQQQQQQNNQQQQQQQQNNQQQQQQQQNNQQQQQQQQNNPQGAEAAAREAAAREAAAREAAARINMSAIKPDMKIKLRMEGNVNGHHFVIDGDGTGKPFEGKQSMDLEVKEGGPLPFAFDILTTAFHYGNRVFAKYPDNIQDYFKQSFPKGYSWERSLTFEDGGICNARNDITMEGDTFYNKVRFYGTNFPANGPVMQKKTLKWEPSTEKMYVRDGVLTGDVEMALLLEGNAHYRCDFRTTYKAKEKGVKLPGAHFVDHCIEILSHDKDYNKVKLYEHAVAHSGLPDNARR
1 Supplement 1 C	rhx3947	Q1N2	NNQNNQNNQN NQNNQNNQNN QNNQNNQNNQ NNQNNQNNQN NQNNQNNQNN QNNQNNQNNQ	ATGTCTGGTAATAATCAAAACAACCAAAATAATCAAAACAATCAAAACAATCAAAATAACCAAAACAATCAAAATAATCAAAATAACCAAAATAACCAAAATAATCAGAACAACCAAAACAACCAGAACAACCAGAATAACCAAAATAATCAAAATAATCAGAACAATCAAAACAACCAAAACAACCAACCACAAGGCGCCGAAGCTGCGGCAAGAGAAGCGGCTGCACGTGAGGCCGCAGCAAGAGAGGCTGCTGCCAGAATTAATATGTCTGCCATTAAACCTGACATGAAAATCAAACTGAGAATGGAAGGAAACGTCAATGGCCATCACTTTGTAATCGACGGTGATGGTACAGGAAAACCATTCGAAGGTAAGCAAAGCATGGATCTGGAGGTA…	MSGNNQNNQNNQNNQNNQNNQNNQNNQNNQNNQNNQNNQNNQNNQNNQNNQNNQNNQNNQNNQPQGAEAAAREAAAREAAAREAAARINMSAIKPDMKIKLRMEGNVNGHHFVIDGDGTGKPFEGKQSMDLEVKEGGPLPFAFDILTTAFHYGNRVFAKYPDNIQDYFKQSFPKGYSWERSLTFEDGGICNARNDITMEGDTFYNKVRFYGTNFPANGPVMQKKTLKWEPSTEKMYVRDGVLTGDVEMALLLEGNAHYRCDFRTTYKAKEKGVKLPGAHFVDHCIEILSHDKDYNKVKLYEHAVAHSGLPDNARR
1 Supplement 1 C	rhx4709	Q3N2	QQQNNQQQNN QQQNNQQQNN QQQNNQQQNN QQQNNQQQNN QQQNNQQQNN QQQNNQQQNN	ATGTCTGGTCAACAACAAAATAACCAACAACAAAACAATCAACAACAAAATAATCAACAACAAAACAACCAGCAGCAAAACAACCAGCAACAGAACAACCAGCAGCAGAATAACCAGCAACAAAACAACCAGCAACAAAATAATCAGCAGCAAAACAACCAACAGCAGAATAACCAACAACAAAATAATCCACAAGGCGCCGAAGCTGCGGCAAGAGAAGCGGCTGCACGTGAGGCCGCAGCAAGAGAGGCTGCTGCCAGAATTAATATGTCTGCCATTAAACCTGACATGAAAATCAAACTGAGAATGGAAGGAAACGTCAATGGCCATCACTTTGTAATCGACGGTGATGGTACAGGAAAACCATTCGAAGGTAAGCAAAGCATGGATCTGGAGGTA…	MSGQQQNNQQQNNQQQNNQQQNNQQQNNQQQNNQQQNNQQQNNQQQNNQQQNNQQQNNQQQNNPQGAEAAAREAAAREAAAREAAARINMSAIKPDMKIKLRMEGNVNGHHFVIDGDGTGKPFEGKQSMDLEVKEGGPLPFAFDILTTAFHYGNRVFAKYPDNIQDYFKQSFPKGYSWERSLTFEDGGICNARNDITMEGDTFYNKVRFYGTNFPANGPVMQKKTLKWEPSTEKMYVRDGVLTGDVEMALLLEGNAHYRCDFRTTYKAKEKGVKLPGAHFVDHCIEILSHDKDYNKVKLYEHAVAHSGLPDNARR
5 A	rhx3458	(Q4N)6(Q3N)15	QQQQNQQQQN QQQQNQQQQN QQQQNQQQQN QQQNQQQNQQ QNQQQNQQQN QQQNQQQNQQ QNQQQNQQQN QQQNQQQNQQ QNQQQNQQQN	ATGTCTGGTCAACAACAACAAAATCAACAACAACAAAACCAGCAGCAACAAAACCAACAACAGCAGAACCAACAACAACAAAACCAACAACAACAAAATCAACAACAAAACCAACAACAAAATCAGCAGCAAAATCAACAACAGAACCAACAACAAAATCAACAGCAGAATCAACAACAAAATCAGCAACAGAATCAGCAGCAAAACCAGCAGCAAAACCAGCAACAGAACCAGCAACAAAATCAACAGCAAAACCAGCAACAAAACCAGCAACAAAATCCACAAGGCGCCGAAGCTGCGGCAAGAGAAGCGGCTGCACGTGAGGCCGCAGCAAGAGAGGCTGCTGCCAGAATTAATATGTCTGCCATTAAACCTGACATGAAAATCAAACTGAGAATG…	MSGQQQQNQQQQNQQQQNQQQQNQQQQNQQQQNQQQNQQQNQQQNQQQNQQQNQQQNQQQNQQQNQQQNQQQNQQQNQQQNQQQNQQQNQQQNPQGAEAAAREAAAREAAAREAAARINMSAIKPDMKIKLRMEGNVNGHHFVIDGDGTGKPFEGKQSMDLEVKEGGPLPFAFDILTTAFHYGNRVFAKYPDNIQDYFKQSFPKGYSWERSLTFEDGGICNARNDITMEGDTFYNKVRFYGTNFPANGPVMQKKTLKWEPSTEKMYVRDGVLTGDVEMALLLEGNAHYRCDFRTTYKAKEKGVKLPGAHFVDHCIEILSHDKDYNKVKLYEHAVAHSGLPDNARR
5 A	rhx4612	(Q2N)10(Q3N)15	QQNQQNQQNQ QNQQNQQNQQ NQQNQQNQQN QQQNQQQNQQ QNQQQNQQQN QQQNQQQNQQ QNQQQNQQQN QQQNQQQNQQ QNQQQNQQQN	ATGTCTGGTCAACAAAACCAACAAAACCAACAAAATCAGCAGAACCAACAAAATCAGCAAAACCAACAAAATCAACAGAACCAACAAAATCAACAAAATCAACAACAAAACCAACAACAAAATCAGCAGCAAAATCAACAACAGAACCAACAACAAAATCAACAGCAGAATCAACAACAAAATCAGCAACAGAATCAGCAGCAAAACCAGCAGCAAAACCAGCAACAGAACCAGCAACAAAATCAACAGCAAAACCAGCAACAAAACCAGCAACAAAATCCACAAGGCGCCGAAGCTGCGGCAAGAGAAGCGGCTGCACGTGAGGCCGCAGCAAGAGAGGCTGCTGCCAGAATTAATATGTCTGCCATTAAACCTGACATGAAAATCAAACTGAGAATG…	MSGQQNQQNQQNQQNQQNQQNQQNQQNQQNQQNQQQNQQQNQQQNQQQNQQQNQQQNQQQNQQQNQQQNQQQNQQQNQQQNQQQNQQQNQQQNPQGAEAAAREAAAREAAAREAAARINMSAIKPDMKIKLRMEGNVNGHHFVIDGDGTGKPFEGKQSMDLEVKEGGPLPFAFDILTTAFHYGNRVFAKYPDNIQDYFKQSFPKGYSWERSLTFEDGGICNARNDITMEGDTFYNKVRFYGTNFPANGPVMQKKTLKWEPSTEKMYVRDGVLTGDVEMALLLEGNAHYRCDFRTTYKAKEKGVKLPGAHFVDHCIEILSHDKDYNKVKLYEHAVAHSGLPDNARR
5 B	rhx4294	Q3N-oDi	QQQNQQQNQQ QNQQQNQQQN QQQNQQQNQQ QNQQQNQQQN QQQNQQQNQQ QNQQQNQQQN	ATGTCTGGTCAACAACAAAACCAACAACAAAATCAGCAGCAAAATCAACAACAGAACCAACAACAAAATCAACAGCAGAATCAACAACAAAATCAGCAACAGAATCAGCAGCAAAACCAGCAGCAAAACCAGCAACAGAACCAGCAACAAAATCAACAGCAAAACCAGCAACAAAACCAGCAACAAAATCCACAAGGCGCCGAAGCTGCGGCAAGAGAAGCGGCTGCACGTGAGGCCGCAGCAAGAGAGGCTGCTGCCAGAATTAATATGTCTGCCATTAAACCTGACATGAAAATCAAACTGAGAATGGAAGGAAACGTCAATGGCCATCACTTTGTAATCGACGGTGATGGTACAGGAAAACCATTCGAAGGTAAGCAAAGCATGGATCTGGAGGTA…	MSGQQQNQQQNQQQNQQQNQQQNQQQNQQQNQQQNQQQNQQQNQQQNQQQNQQQNQQQNQQQNPQGAEAAAREAAAREAAAREAAARINMSAIKPDMKIKLRMEGNVNGHHFVIDGDGTGKPFEGKQSMDLEVKEGGPLPFAFDILTTAFHYGNRVFAKYPDNIQDYFKQSFPKGYSWERSLTFEDGGICNARNDITMEGDTFYNKVRFYGTNFPANGPVMQKKTLKWEPSTEKMYVRDGVLTGDVEMALLLEGNAHYRCDFRTTYKAKEKGVKLPGAHFVDHCIEILSHDKDYNKVKLYEHAVAHSGLPDNARRGGGGSGGGGSGGGGSPEDEIAALKKEIAALKQENAALKQEIAALKKEIAALKQG
5 B	rhx4633	Q3N-FTH1	QQQNQQQNQQ QNQQQNQQQN QQQNQQQNQQ QNQQQNQQQN QQQNQQQNQQ QNQQQNQQQN	ATGTCTGGTCAACAACAAAACCAACAACAAAATCAGCAGCAAAATCAACAACAGAACCAACAACAAAATCAACAGCAGAATCAACAACAAAATCAGCAACAGAATCAGCAGCAAAACCAGCAGCAAAACCAGCAACAGAACCAGCAACAAAATCAACAGCAAAACCAGCAACAAAACCAGCAACAAAATCCACAAGGCGCCGAAGCTGCGGCAAGAGAAGCGGCTGCACGTGAGGCCGCAGCAAGAGAGGCTGCTGCCAGAATTAATATGTCTGCCATTAAACCTGACATGAAAATCAAACTGAGAATGGAAGGAAACGTCAATGGCCATCACTTTGTAATCGACGGTGATGGTACAGGAAAACCATTCGAAGGTAAGCAAAGCATGGATCTGGAGGTA…	MSGQQQNQQQNQQQNQQQNQQQNQQQNQQQNQQQNQQQNQQQNQQQNQQQNQQQNQQQNQQQNPQGAEAAAREAAAREAAAREAAARINMSAIKPDMKIKLRMEGNVNGHHFVIDGDGTGKPFEGKQSMDLEVKEGGPLPFAFDILTTAFHYGNRVFAKYPDNIQDYFKQSFPKGYSWERSLTFEDGGICNARNDITMEGDTFYNKVRFYGTNFPANGPVMQKKTLKWEPSTEKMYVRDGVLTGDVEMALLLEGNAHYRCDFRTTYKAKEKGVKLPGAHFVDHCIEILSHDKDYNKVKLYEHAVAHSGLPDNARRGGGGSGGGGSGGGGSMSMTTASTSQVRQNYHQDSEAAINRQINLELYASYVYLSMSYYFDRDDVALKNFAKYFLHQSHEEREHA…
5 B	rhx4293	Q7N-oDi	QQQQQQQNQQ QQQQQNQQQQ QQQNQQQQQQ QNQQQQQQQN QQQQQQQNQQ QQQQQNQQQQ	ATGTCTGGTCAACAGCAGCAACAACAACAAAACCAACAGCAACAGCAACAACAAAACCAACAACAGCAGCAGCAACAAAACCAACAACAACAGCAGCAACAAAATCAACAGCAACAACAGCAACAAAATCAACAACAGCAACAGCAGCAAAACCAACAGCAACAACAACAGCAAAATCAGCAACAACAACCTCAAGGCGCCGAAGCTGCGGCAAGAGAAGCGGCTGCACGTGAGGCCGCAGCAAGAGAGGCTGCTGCCAGAATTAATATGTCTGCCATTAAACCTGACATGAAAATCAAACTGAGAATGGAAGGAAACGTCAATGGCCATCACTTTGTAATCGACGGTGATGGTACAGGAAAACCATTCGAAGGTAAGCAAAGCATGGATCTGGAGGTA…	MSGQQQQQQQNQQQQQQQNQQQQQQQNQQQQQQQNQQQQQQQNQQQQQQQNQQQQQQQNQQQQPQGAEAAAREAAAREAAAREAAARINMSAIKPDMKIKLRMEGNVNGHHFVIDGDGTGKPFEGKQSMDLEVKEGGPLPFAFDILTTAFHYGNRVFAKYPDNIQDYFKQSFPKGYSWERSLTFEDGGICNARNDITMEGDTFYNKVRFYGTNFPANGPVMQKKTLKWEPSTEKMYVRDGVLTGDVEMALLLEGNAHYRCDFRTTYKAKEKGVKLPGAHFVDHCIEILSHDKDYNKVKLYEHAVAHSGLPDNARRGGGGSGGGGSGGGGSPEDEIAALKKEIAALKQENAALKQEIAALKKEIAALKQG
5 B	rhx4631	Q7N-FTH1	QQQQQQQNQQ QQQQQNQQQQ QQQNQQQQQQ QNQQQQQQQN QQQQQQQNQQ QQQQQNQQQQ	ATGTCTGGTCAACAGCAGCAACAACAACAAAACCAACAGCAACAGCAACAACAAAACCAACAACAGCAGCAGCAACAAAACCAACAACAACAGCAGCAACAAAATCAACAGCAACAACAGCAACAAAATCAACAACAGCAACAGCAGCAAAACCAACAGCAACAACAACAGCAAAATCAGCAACAACAACCTCAAGGCGCCGAAGCTGCGGCAAGAGAAGCGGCTGCACGTGAGGCCGCAGCAAGAGAGGCTGCTGCCAGAATTAATATGTCTGCCATTAAACCTGACATGAAAATCAAACTGAGAATGGAAGGAAACGTCAATGGCCATCACTTTGTAATCGACGGTGATGGTACAGGAAAACCATTCGAAGGTAAGCAAAGCATGGATCTGGAGGTA…	MSGQQQQQQQNQQQQQQQNQQQQQQQNQQQQQQQNQQQQQQQNQQQQQQQNQQQQQQQNQQQQPQGAEAAAREAAAREAAAREAAARINMSAIKPDMKIKLRMEGNVNGHHFVIDGDGTGKPFEGKQSMDLEVKEGGPLPFAFDILTTAFHYGNRVFAKYPDNIQDYFKQSFPKGYSWERSLTFEDGGICNARNDITMEGDTFYNKVRFYGTNFPANGPVMQKKTLKWEPSTEKMYVRDGVLTGDVEMALLLEGNAHYRCDFRTTYKAKEKGVKLPGAHFVDHCIEILSHDKDYNKVKLYEHAVAHSGLPDNARRGGGGSGGGGSGGGGSMSMTTASTSQVRQNYHQDSEAAINRQINLELYASYVYLSMSYYFDRDDVALKNFAKYFLHQSHEEREHA…
5 B	rhx4242	Q60-oDi	QQQQQQQQQQ QQQQQQQQQQ QQQQQQQQQQ QQQQQQQQQQ QQQQQQQQQQ QQQQQQQQQQ	ATGTCTGGTCAACAGCAGCAACAGCAGCAACAGCAACAGCAACAACAGCAGCAACAACAGCAACAGCAGCAGCAACAGCAACAACAACAGCAACAACAGCAACAACAACAACAGCAGCAGCAGCAACAACAACAACAACAGCAACAACAACAGCAGCAACAACAACAACAACAACAACAACAACAACAACCGCAAGGCGCCGAAGCTGCGGCAAGAGAAGCGGCTGCACGTGAGGCCGCAGCAAGAGAGGCTGCTGCCAGAATTAATATGTCTGCCATTAAACCTGACATGAAAATCAAACTGAGAATGGAAGGAAACGTCAATGGCCATCACTTTGTAATCGACGGTGATGGTACAGGAAAACCATTCGAAGGTAAGCAAAGCATGGATCTGGAGGTA…	MSGQQQQQQQQQQQQQQQQQQQQQQQQQQQQQQQQQQQQQQQQQQQQQQQQQQQQQQQQQQQQPQGAEAAAREAAAREAAAREAAARINMSAIKPDMKIKLRMEGNVNGHHFVIDGDGTGKPFEGKQSMDLEVKEGGPLPFAFDILTTAFHYGNRVFAKYPDNIQDYFKQSFPKGYSWERSLTFEDGGICNARNDITMEGDTFYNKVRFYGTNFPANGPVMQKKTLKWEPSTEKMYVRDGVLTGDVEMALLLEGNAHYRCDFRTTYKAKEKGVKLPGAHFVDHCIEILSHDKDYNKVKLYEHAVAHSGLPDNARRGGGGSGGGGSGGGGSPEDEIAALKKEIAALKQENAALKQEIAALKKEIAALKQG
5 B	rhx4632	Q60-FTH1	QQQQQQQQQQ QQQQQQQQQQ QQQQQQQQQQ QQQQQQQQQQ QQQQQQQQQQ QQQQQQQQQQ	ATGTCTGGTCAACAGCAGCAACAGCAGCAACAGCAACAGCAACAACAGCAGCAACAACAGCAACAGCAGCAGCAACAGCAACAACAACAGCAACAACAGCAACAACAACAACAGCAGCAGCAGCAACAACAACAACAACAGCAACAACAACAGCAGCAACAACAACAACAACAACAACAACAACAACAACCGCAAGGCGCCGAAGCTGCGGCAAGAGAAGCGGCTGCACGTGAGGCCGCAGCAAGAGAGGCTGCTGCCAGAATTAATATGTCTGCCATTAAACCTGACATGAAAATCAAACTGAGAATGGAAGGAAACGTCAATGGCCATCACTTTGTAATCGACGGTGATGGTACAGGAAAACCATTCGAAGGTAAGCAAAGCATGGATCTGGAGGTA…	MSGQQQQQQQQQQQQQQQQQQQQQQQQQQQQQQQQQQQQQQQQQQQQQQQQQQQQQQQQQQQQPQGAEAAAREAAAREAAAREAAARINMSAIKPDMKIKLRMEGNVNGHHFVIDGDGTGKPFEGKQSMDLEVKEGGPLPFAFDILTTAFHYGNRVFAKYPDNIQDYFKQSFPKGYSWERSLTFEDGGICNARNDITMEGDTFYNKVRFYGTNFPANGPVMQKKTLKWEPSTEKMYVRDGVLTGDVEMALLLEGNAHYRCDFRTTYKAKEKGVKLPGAHFVDHCIEILSHDKDYNKVKLYEHAVAHSGLPDNARRGGGGSGGGGSGGGGSMSMTTASTSQVRQNYHQDSEAAINRQINLELYASYVYLSMSYYFDRDDVALKNFAKYFLHQSHEEREHA…
5 Supplement 1 C	rhx4584	Q60	QQQQQQQQQQ QQQQQQQQQQ QQQQQQQQQQ QQQQQQQQQQ QQQQQQQQQQ QQQQQQQQQQ	ATGTCTGGTCAACAGCAGCAACAGCAGCAACAGCAACAGCAACAACAGCAGCAACAACAGCAACAGCAGCAGCAACAGCAACAACAACAGCAACAACAGCAACAACAACAACAGCAGCAGCAGCAACAACAACAACAACAGCAACAACAACAGCAGCAACAACAACAACAACAACAACAACAACAACAACCGCAAGGTGGTGGTGGTTCTGGTGGTGGTGGTTCTGGTGGTGGTGGTTCTATTAATATGTCTGCCATTAAACCTGACATGAAAATCAAACTGAGAATGGAAGGAAACGTCAATGGCCATCACTTTGTAATCGACGGTGATGGTACAGGAAAACCATTCGAAGGTAAGCAAAGCATGGATCTGGAGGTAAAAGAGGGTGGCCCACTCCCA…	MSGQQQQQQQQQQQQQQQQQQQQQQQQQQQQQQQQQQQQQQQQQQQQQQQQQQQQQQQQQQQQPQGGGGSGGGGSGGGGSINMSAIKPDMKIKLRMEGNVNGHHFVIDGDGTGKPFEGKQSMDLEVKEGGPLPFAFDILTTAFHYGNRVFAKYPDNIQDYFKQSFPKGYSWERSLTFEDGGICNARNDITMEGDTFYNKVRFYGTNFPANGPVMQKKTLKWEPSTEKMYVRDGVLTGDVEMALLLEGNAHYRCDFRTTYKAKEKGVKLPGAHFVDHCIEILSHDKDYNKVKLYEHAVAHSGLPDNARR
5 Supplement 1 C	rhx4345b	oDi-Q60	QQQQQQQQQQ QQQQQQQQQQ QQQQQQQQQQ QQQQQQQQQQ QQQQQQQQQQ QQQQQQQQQQ	ATGTCTCCAGAAGATGAAATTGCTGCTTTGAAAAAGGAAATTGCAGCTTTAAAACAAGAAAATGCAGCTTTGAAACAAGAAATTGCTGCATTGAAAAAGGAAATTGCTGCATTAAAACAAGGTTCTGGTGGTGGTGGTTCTGGTGGTGGTGGTTCAGGTGGTGGTGGTGCCATTAAACCTGACATGAAAATCAAACTGAGAATGGAAGGAAACGTCAATGGCCATCACTTTGTAATCGACGGTGATGGTACAGGAAAACCATTCGAAGGTAAGCAAAGCATGGATCTGGAGGTAAAAGAGGGTGGCCCACTCCCATTTGCATTCGATATCTTAACCACCGCCTTTCATTACGGTAACAGAGTTTTTGCAAAGTATCCTGATAACATTCAAGATTATTTC…	MSPEDEIAALKKEIAALKQENAALKQEIAALKKEIAALKQGSGGGGSGGGGSGGGGAIKPDMKIKLRMEGNVNGHHFVIDGDGTGKPFEGKQSMDLEVKEGGPLPFAFDILTTAFHYGNRVFAKYPDNIQDYFKQSFPKGYSWERSLTFEDGGICNARNDITMEGDTFYNKVRFYGTNFPANGPVMQKKTLKWEPSTEKMYVRDGVLTGDVEMALLLEGNAHYRCDFRTTYKAKEKGVKLPGAHFVDHCIEILSHDKDYNKVKLYEHAVAHSGLPDNARRGAPEAAAREAAAREAAAREAAARMSGQQQQQQQQQQQQQQQQQQQQQQQQQQQQQQQQQQQQQQQQQQQQQQQQQQQQQQQQQQQQPQ
5 Supplement 1 C,D	rhx4615	Q60-oDi	QQQQQQQQQQ QQQQQQQQQQ QQQQQQQQQQ QQQQQQQQQQ QQQQQQQQQQ QQQQQQQQQQ	ATGTCTGGTCAACAGCAGCAACAGCAGCAACAGCAACAGCAACAACAGCAGCAACAACAGCAACAGCAGCAGCAACAGCAACAACAACAGCAACAACAGCAACAACAACAACAGCAGCAGCAGCAACAACAACAACAACAGCAACAACAACAGCAGCAACAACAACAACAACAACAACAACAACAACAACCGCAAGGCGCCGGTGGTGGTGGTTCAGGCGGTGGTGGTAGTGGCGGTGGTGGTTCTGGTGGTGGTGGTTCAATTAATATGTCTGCCATTAAACCTGACATGAAAATCAAACTGAGAATGGAAGGAAACGTCAATGGCCATCACTTTGTAATCGACGGTGATGGTACAGGAAAACCATTCGAAGGTAAGCAAAGCATGGATCTGGAGGTA…	MSGQQQQQQQQQQQQQQQQQQQQQQQQQQQQQQQQQQQQQQQQQQQQQQQQQQQQQQQQQQQQPQGAGGGGSGGGGSGGGGSGGGGSINMSAIKPDMKIKLRMEGNVNGHHFVIDGDGTGKPFEGKQSMDLEVKEGGPLPFAFDILTTAFHYGNRVFAKYPDNIQDYFKQSFPKGYSWERSLTFEDGGICNARNDITMEGDTFYNKVRFYGTNFPANGPVMQKKTLKWEPSTEKMYVRDGVLTGDVEMALLLEGNAHYRCDFRTTYKAKEKGVKLPGAHFVDHCIEILSHDKDYNKVKLYEHAVAHSGLPDNARRGGGGSGGGGSGGGGSPEDEIAALKKEIAALKQENAALKQEIAALKKEIAALKQG
5 Supplement 1 D	rhx4619	Q60-oDi{X}	QQQQQQQQQQ QQQQQQQQQQ QQQQQQQQQQ QQQQQQQQQQ QQQQQQQQQQ QQQQQQQQQQ	ATGTCTGGTCAACAGCAGCAACAGCAGCAACAGCAACAGCAACAACAGCAGCAACAACAGCAACAGCAGCAGCAACAGCAACAACAACAGCAACAACAGCAACAACAACAACAGCAGCAGCAGCAACAACAACAACAACAGCAACAACAACAGCAGCAACAACAACAACAACAACAACAACAACAACAACCGCAAGGCGCCGGTGGTGGTGGTTCAGGCGGTGGTGGTAGTGGCGGTGGTGGTTCTGGTGGTGGTGGTTCAATTAATATGTCTGCCATTAAACCTGACATGAAAATCAAACTGAGAATGGAAGGAAACGTCAATGGCCATCACTTTGTAATCGACGGTGATGGTACAGGAAAACCATTCGAAGGTAAGCAAAGCATGGATCTGGAGGTA…	MSGQQQQQQQQQQQQQQQQQQQQQQQQQQQQQQQQQQQQQQQQQQQQQQQQQQQQQQQQQQQQPQGAGGGGSGGGGSGGGGSGGGGSINMSAIKPDMKIKLRMEGNVNGHHFVIDGDGTGKPFEGKQSMDLEVKEGGPLPFAFDILTTAFHYGNRVFAKYPDNIQDYFKQSFPKGYSWERSLTFEDGGICNARNDITMEGDTFYNKVRFYGTNFPANGPVMQKKTLKWEPSTEKMYVRDGVLTGDVEMALLLEGNAHYRCDFRTTYKAKEKGVKLPGAHFVDHCIEILSHDKDYNKVKLYEHAVAHSGLPDNARRGGGGSGGGGSGGGGSPEDEIAAKLEIKAAKLQENAALKQEIAALKKEIAALKQG
5 C	rhx4071	(Q6)4	QQQQQQGGGQ QQQQQGGGQQ QQQQGGGQQQ QQQ	ATGTCTGGTCAACAACAACAACAACAAGGTGGTGGTCAGCAGCAGCAGCAACAAGGTGGTGGTCAACAGCAGCAACAGCAAGGTGGTGGTCAGCAACAGCAACAACAACCACAAGGCGCCGAAGCTGCGGCAAGAGAAGCGGCTGCACGTGAGGCCGCAGCAAGAGAGGCTGCTGCCAGAATTAATATGTCTGCCATTAAACCTGACATGAAAATCAAACTGAGAATGGAAGGAAACGTCAATGGCCATCACTTTGTAATCGACGGTGATGGTACAGGAAAACCATTCGAAGGTAAGCAAAGCATGGATCTGGAGGTAAAAGAGGGTGGCCCACTCCCATTTGCATTCGATATCTTAACCACCGCCTTTCATTACGGTAACAGAGTTTTTGCAAAGTAT…	MSGQQQQQQGGGQQQQQQGGGQQQQQQGGGQQQQQQPQGAEAAAREAAAREAAAREAAARINMSAIKPDMKIKLRMEGNVNGHHFVIDGDGTGKPFEGKQSMDLEVKEGGPLPFAFDILTTAFHYGNRVFAKYPDNIQDYFKQSFPKGYSWERSLTFEDGGICNARNDITMEGDTFYNKVRFYGTNFPANGPVMQKKTLKWEPSTEKMYVRDGVLTGDVEMALLLEGNAHYRCDFRTTYKAKEKGVKLPGAHFVDHCIEILSHDKDYNKVKLYEHAVAHSGLPDNARR
5 C	rhx4134	(Q6)4 "Q10N"	QQQQQQGGGQ QQNQQGGGQQ QQQQGGGQQQ QQQ	ATGTCTGGTCAACAACAACAACAACAAGGTGGTGGTCAGCAGCAGAATCAACAAGGTGGTGGTCAACAGCAGCAACAGCAAGGTGGTGGTCAGCAACAGCAACAACAACCACAAGGCGCCGAAGCTGCGGCAAGAGAAGCGGCTGCACGTGAGGCCGCAGCAAGAGAGGCTGCTGCCAGAATTAATATGTCTGCCATTAAACCTGACATGAAAATCAAACTGAGAATGGAAGGAAACGTCAATGGCCATCACTTTGTAATCGACGGTGATGGTACAGGAAAACCATTCGAAGGTAAGCAAAGCATGGATCTGGAGGTAAAAGAGGGTGGCCCACTCCCATTTGCATTCGATATCTTAACCACCGCCTTTCATTACGGTAACAGAGTTTTTGCAAAGTAT…	MSGQQQQQQGGGQQQNQQGGGQQQQQQGGGQQQQQQPQGAEAAAREAAAREAAAREAAARINMSAIKPDMKIKLRMEGNVNGHHFVIDGDGTGKPFEGKQSMDLEVKEGGPLPFAFDILTTAFHYGNRVFAKYPDNIQDYFKQSFPKGYSWERSLTFEDGGICNARNDITMEGDTFYNKVRFYGTNFPANGPVMQKKTLKWEPSTEKMYVRDGVLTGDVEMALLLEGNAHYRCDFRTTYKAKEKGVKLPGAHFVDHCIEILSHDKDYNKVKLYEHAVAHSGLPDNARR
